# Supplementary material for: Taxon-specific aerosolization of bacteria and viruses in an experimental ocean-atmosphere mesocosm
Source: PubMed Central journal article supplement (PMC5964107; doi:10.1038/s41467-018-04409-z), 2018-05-22
Supplement: 41467_2018_4409_MOESM1_ESM.pdf [file 41467_2018_4409_MOESM1_ESM.pdf]

## **Supplementary Information**

### **Taxon-specific aerosolization of bacteria and viruses in an experimental ocean-atmosphere mesocosm**

**Michaud *et al.***

#### **1. Supplementary Figures**

#### **2. Supplementary Tables**

#### **3. Supplementary Notes**

**Supplementary Note 1: Bloom dynamics**

**Supplementary Note 2: Genomic data analysis**

**DNA yields**

**Metagenomic sequencing**

**Coverage analysis**

**Genomic assembly and annotation**

#### **4. Supplementary References**

# 1. Supplementary Figures

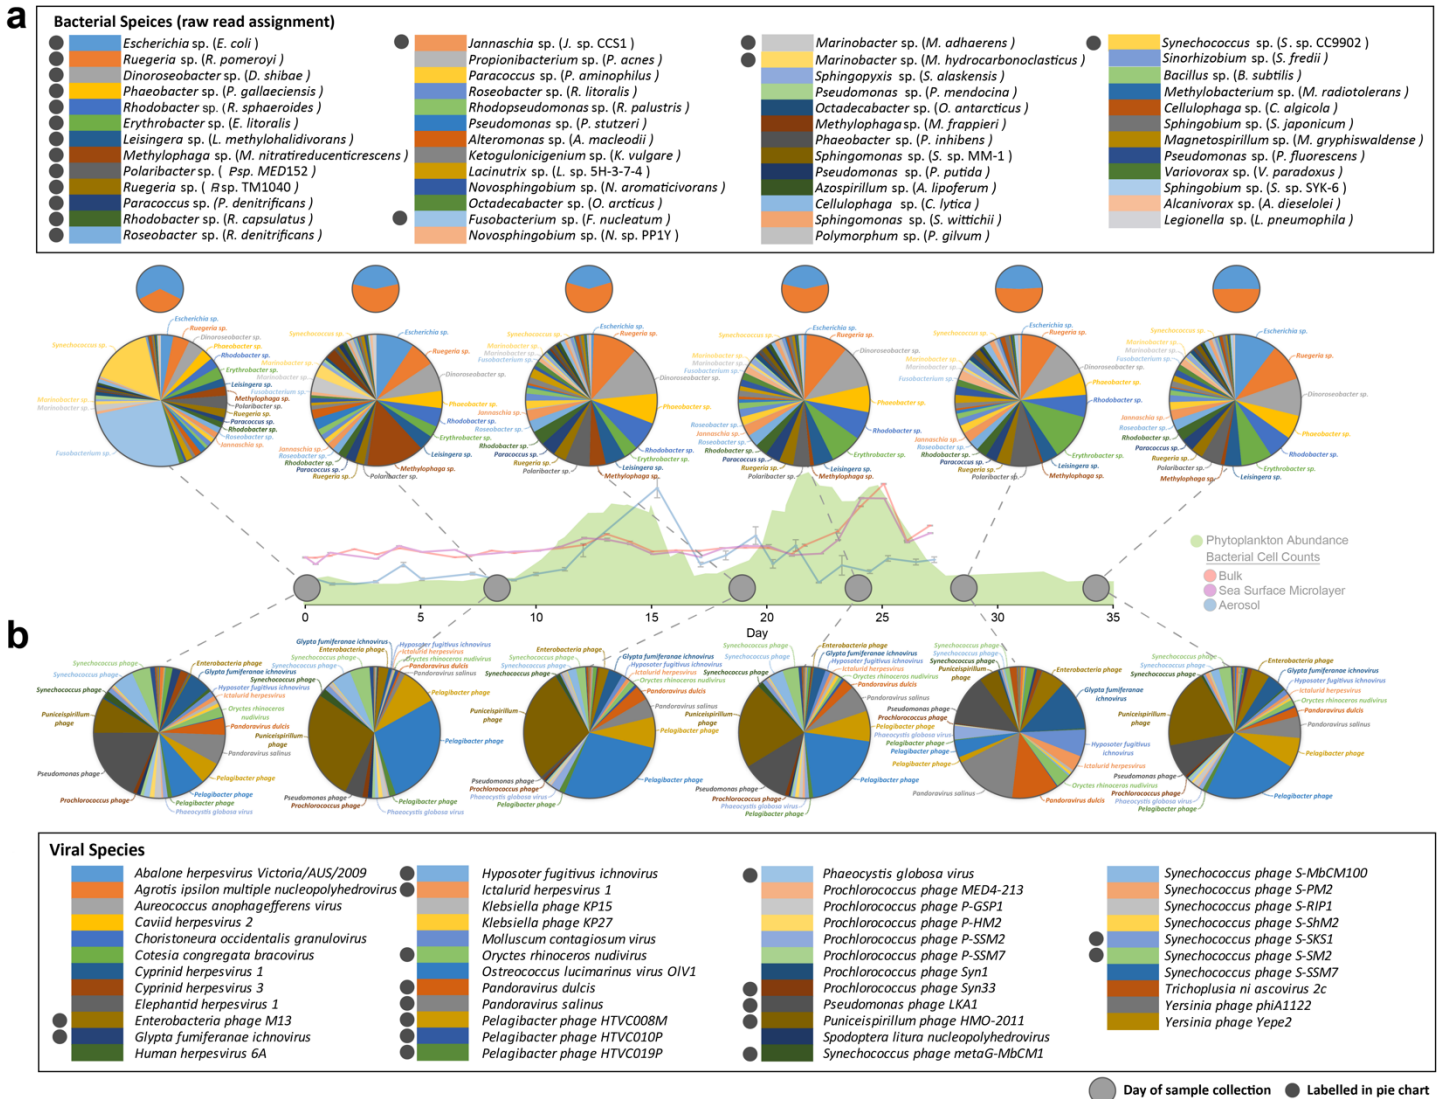

**Supplementary Fig. 1** Bacterial and viral genome variation across the phytoplankton blooms. Bacteria (51 most abundant genomes), **a**, and viruses **b**, as determined by read based analysis on abundance trimmed data. Legends indicate species represented with dark gray circles denoting those that are labelled in the chart. Light gray circles on middle plot indicate day of sampling. Middle Plot shows phytoplankton abundance and bacterial abundance as reported in Figure 1. **a**. Orange portion of small pie charts above larger species pie charts represents 51 abundant genomes during the experiment and blue represents the remainder of the population. Abundance determined by number of samples above 0.5% of population and by sum of fraction of samples across blooms. Expanded pie charts demonstrate the identity and abundance of these species. Identities derived from bulk 0.2–3  $\mu\text{m}$  samples. **b**. Virus species from 0.025–0.2  $\mu\text{m}$  bulk samples. Error bars indicate s.d. and estimated error in aerosol measurements.

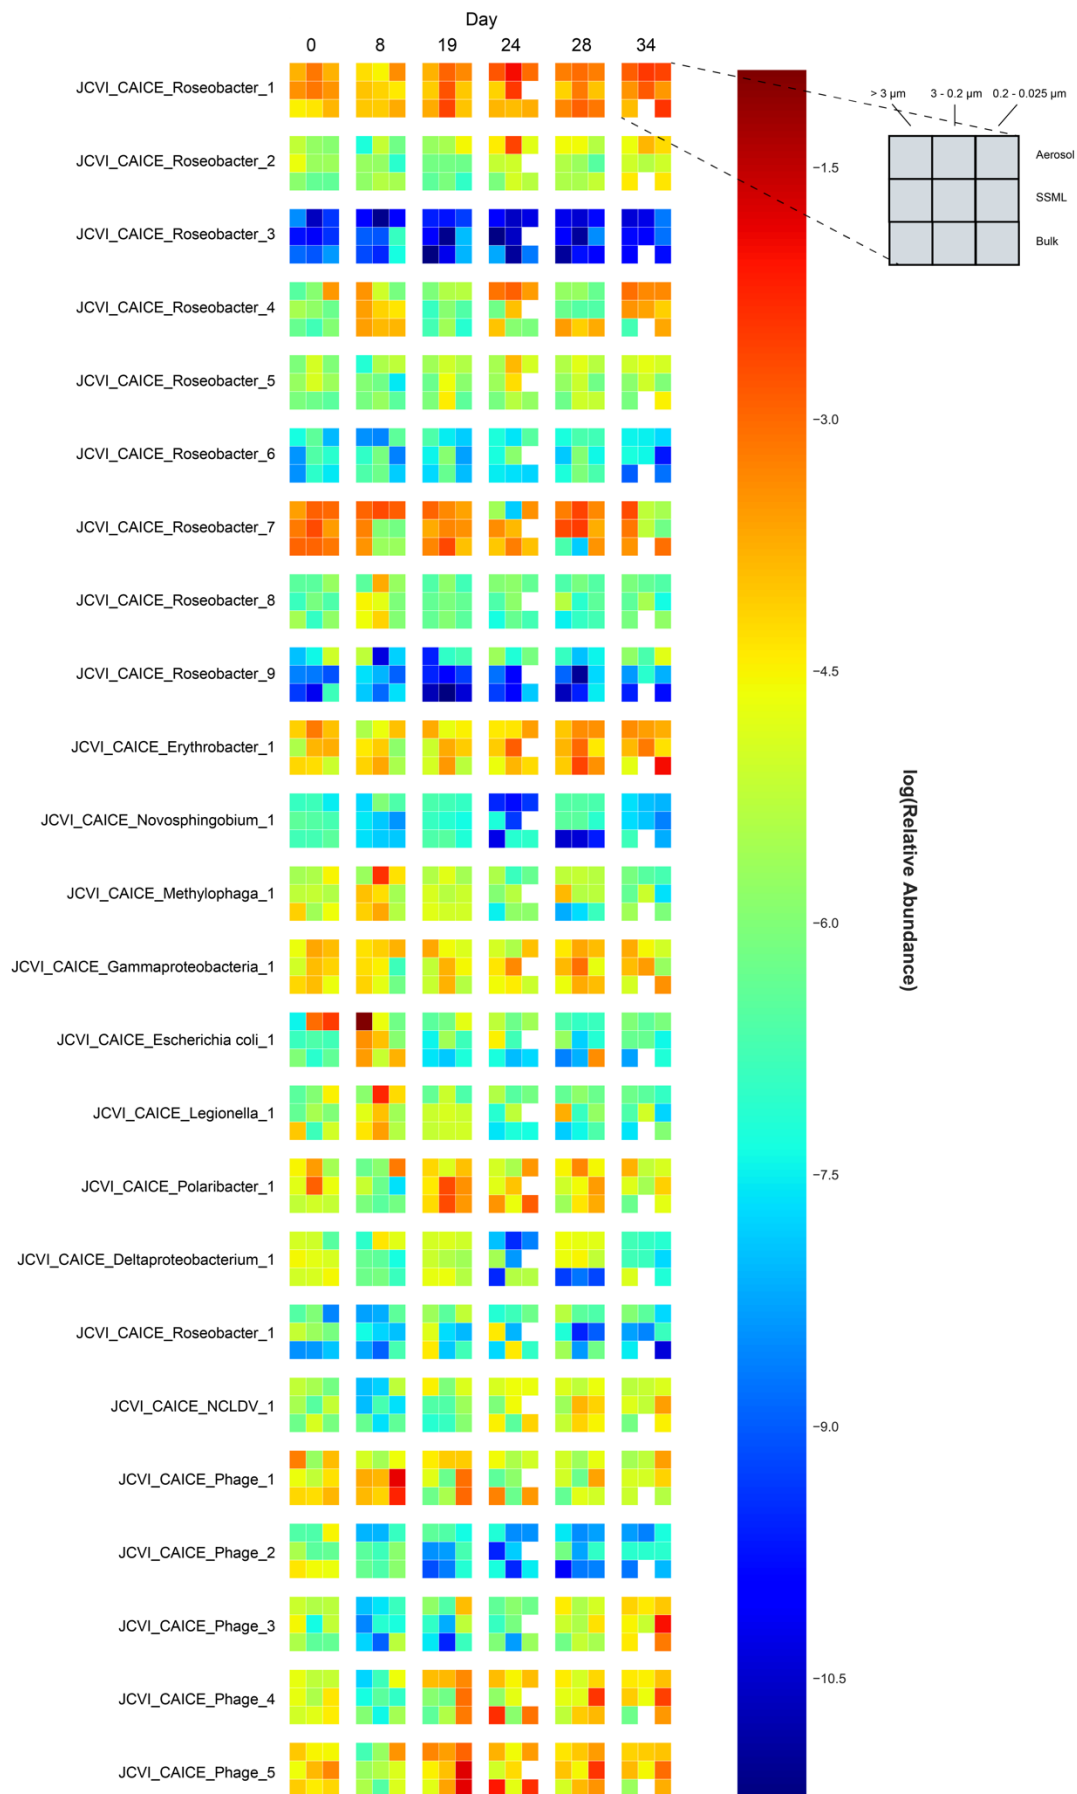

**Supplementary Fig. 2** Abundance of draft genomes. 18 bacterial and 6 viral draft genomes determined by assembly based methods. Heatmap indicates fractional abundance of species in the sample. Day of sample is indicated on top columns. For each 9-square group size fraction is indicated from left to right: >3 μm, 0.02 – 3 μm, and 0.025 – 0.2 μm, and top to bottom: Aerosol, SSML, and bulk water compartments. Schematic in upper right corner indicates this sample arrangement. Blanks indicate samples below threshold limits.

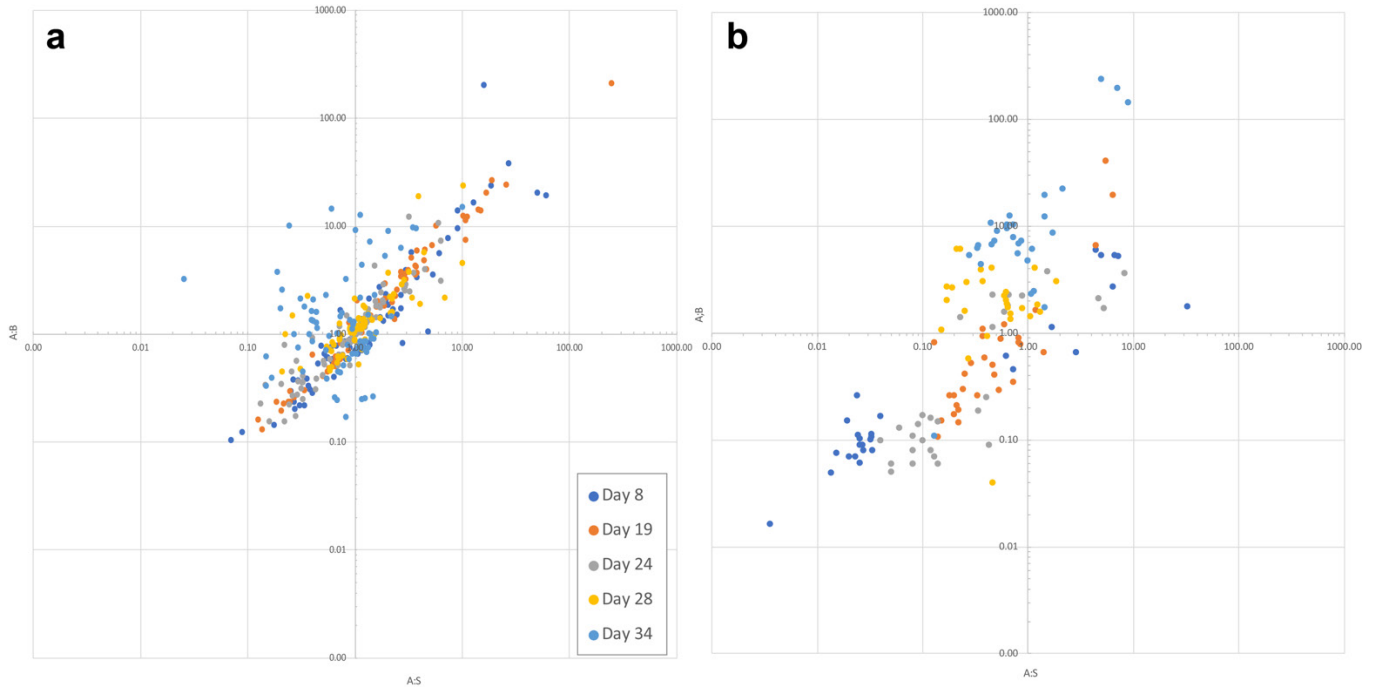

**Supplementary Fig. 3** Genome spatial coverage trimmed bacterial and viral populations aerosolization distribution. The ratio of fraction of genomes in aerosols to the fraction in bulk plotted against ratio of fraction of genomes in aerosols to those in sea surface is shown for bacteria, **a**, and viruses, **b**, in genome spatial coverage trimmed data sets on select days. The upper right quadrants of **a** and **b** indicate genomes enriched in aerosol relative to both bulk and SSML ( $A:B$  and  $A:S > 1$ ); the lower left quadrants indicates genomes that are primarily waterborne ( $A:B$  and  $A:S < 1$ ). The upper left quadrant indicates genomes enriched relative to bulk but not SSML ( $A:B > 1$ ,  $A:S < 1$ ), and the lower right indicates genomes enriched in aerosol relative to the surface but not bulk ( $A:B < 1$ ,  $A:S > 1$ ). The data sets represent **a**, 76 bacterial genomes, and **b**, 30 viral genomes identified by read-based taxonomic assignments trimmed of species with low genome spatial coverage.

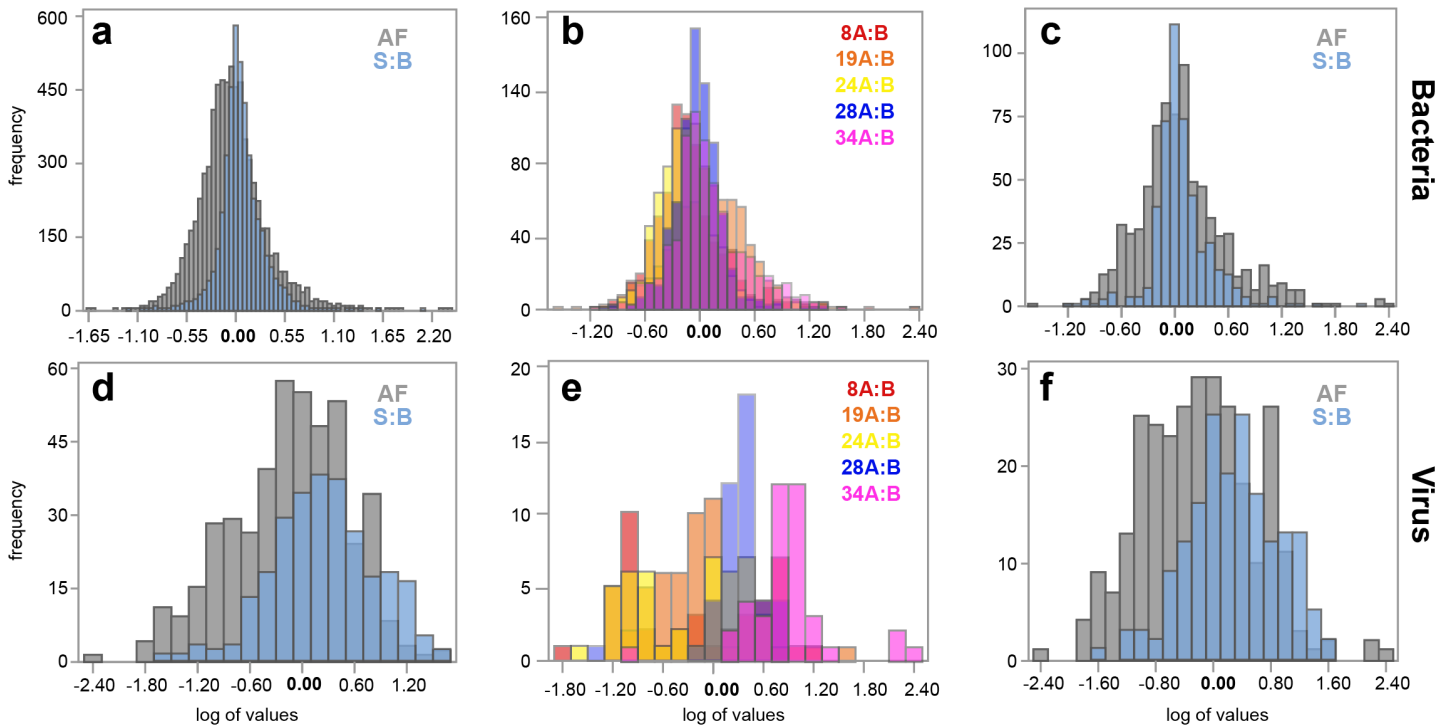

**Supplementary Fig. 4** Population distribution of aerosolization and surface enrichment data sets. Histograms of all aerosolization factors (AFs) and surface enrichment factors (S:B) for bacteria, **a–c**, and viruses, **d–f** given by log values. **a**, **d** represent pooled AF and S:B values for abundance trimmed but not coverage trimmed data. **b**, **e** demonstrate day resolved variance in A:B distributions of these partially trimmed data sets. **c**, **f** show the pooled AF and S:B values for the fully trimmed data sets.



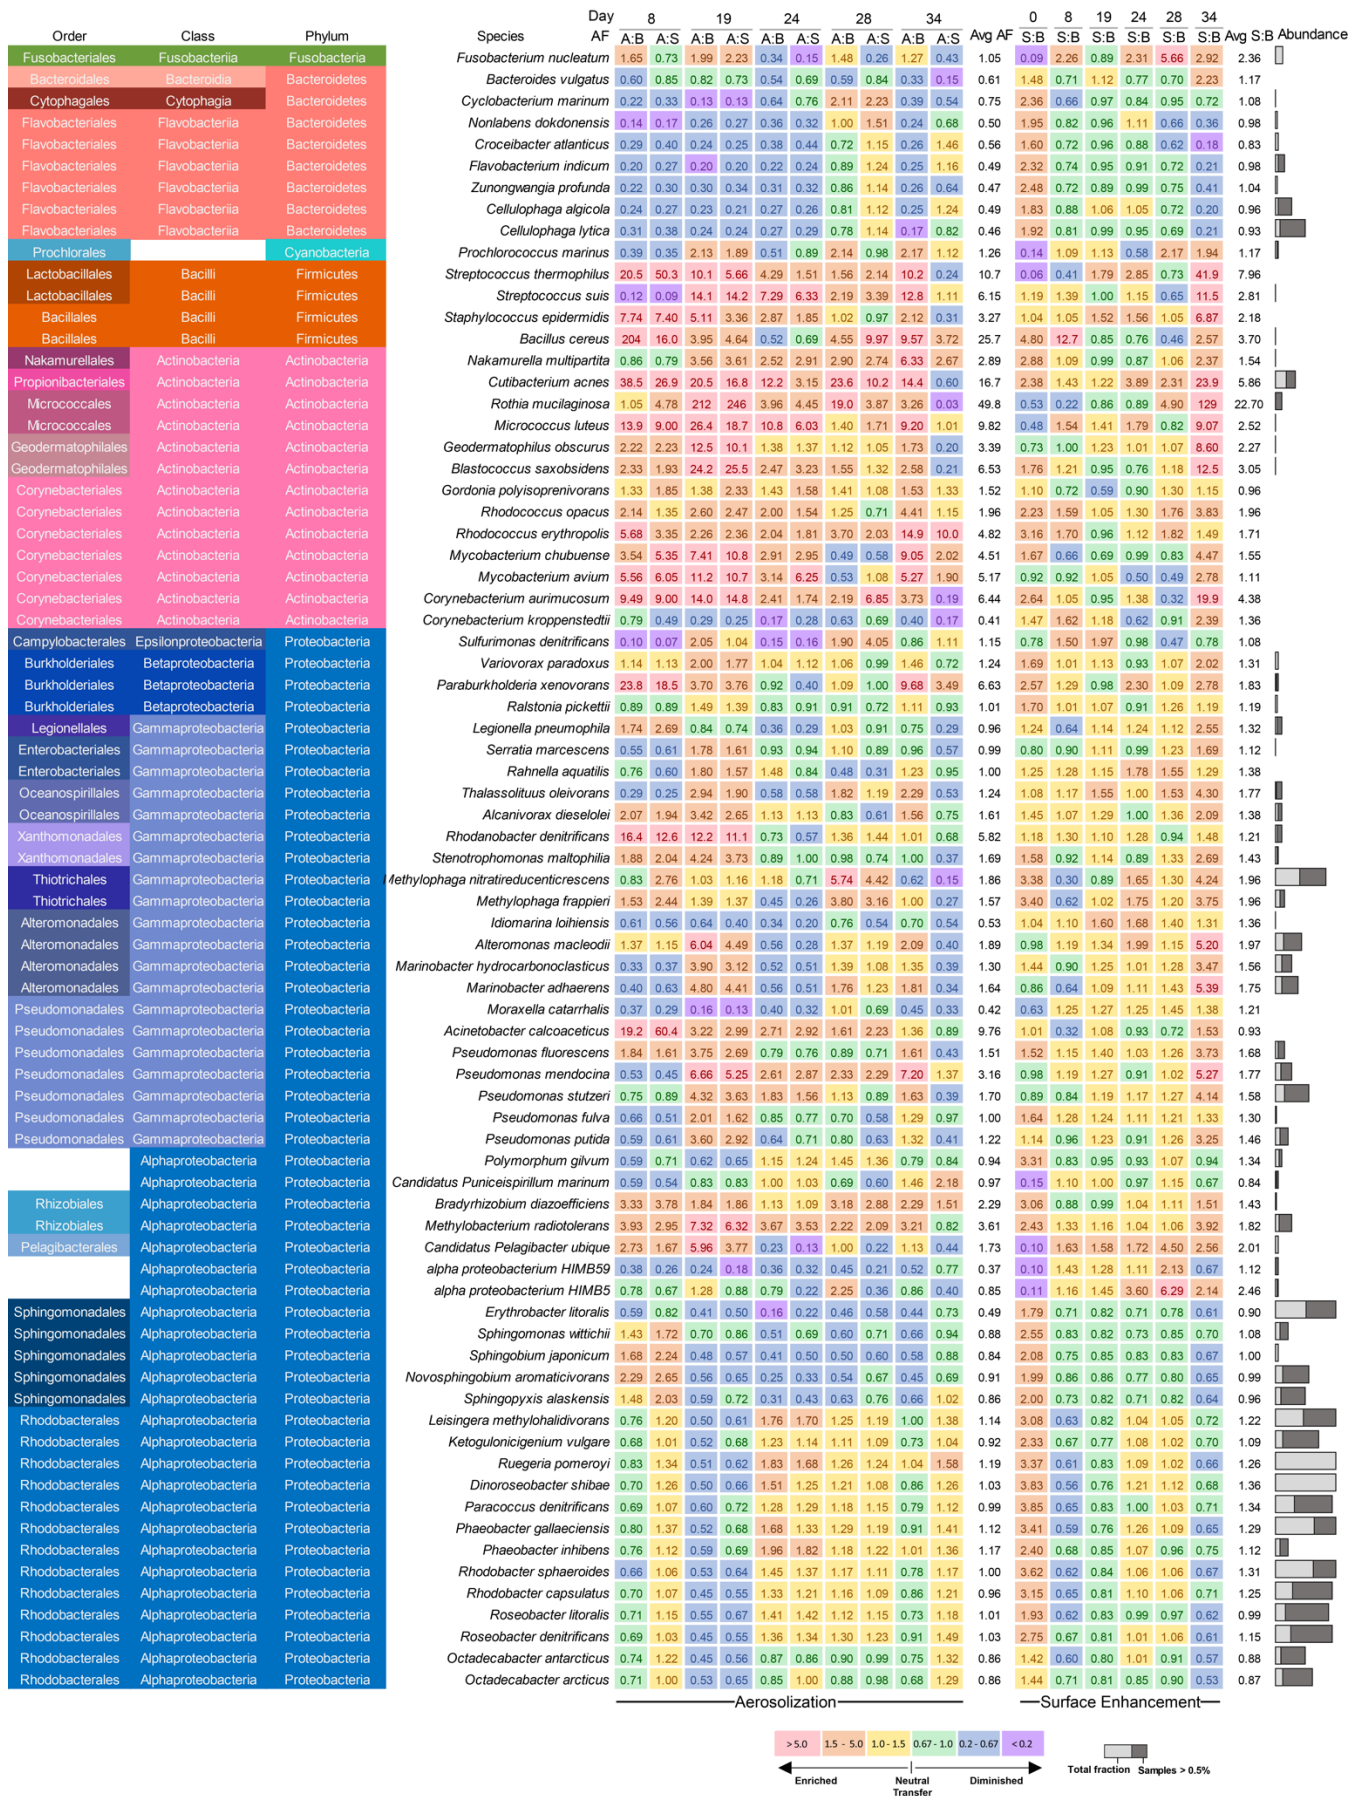

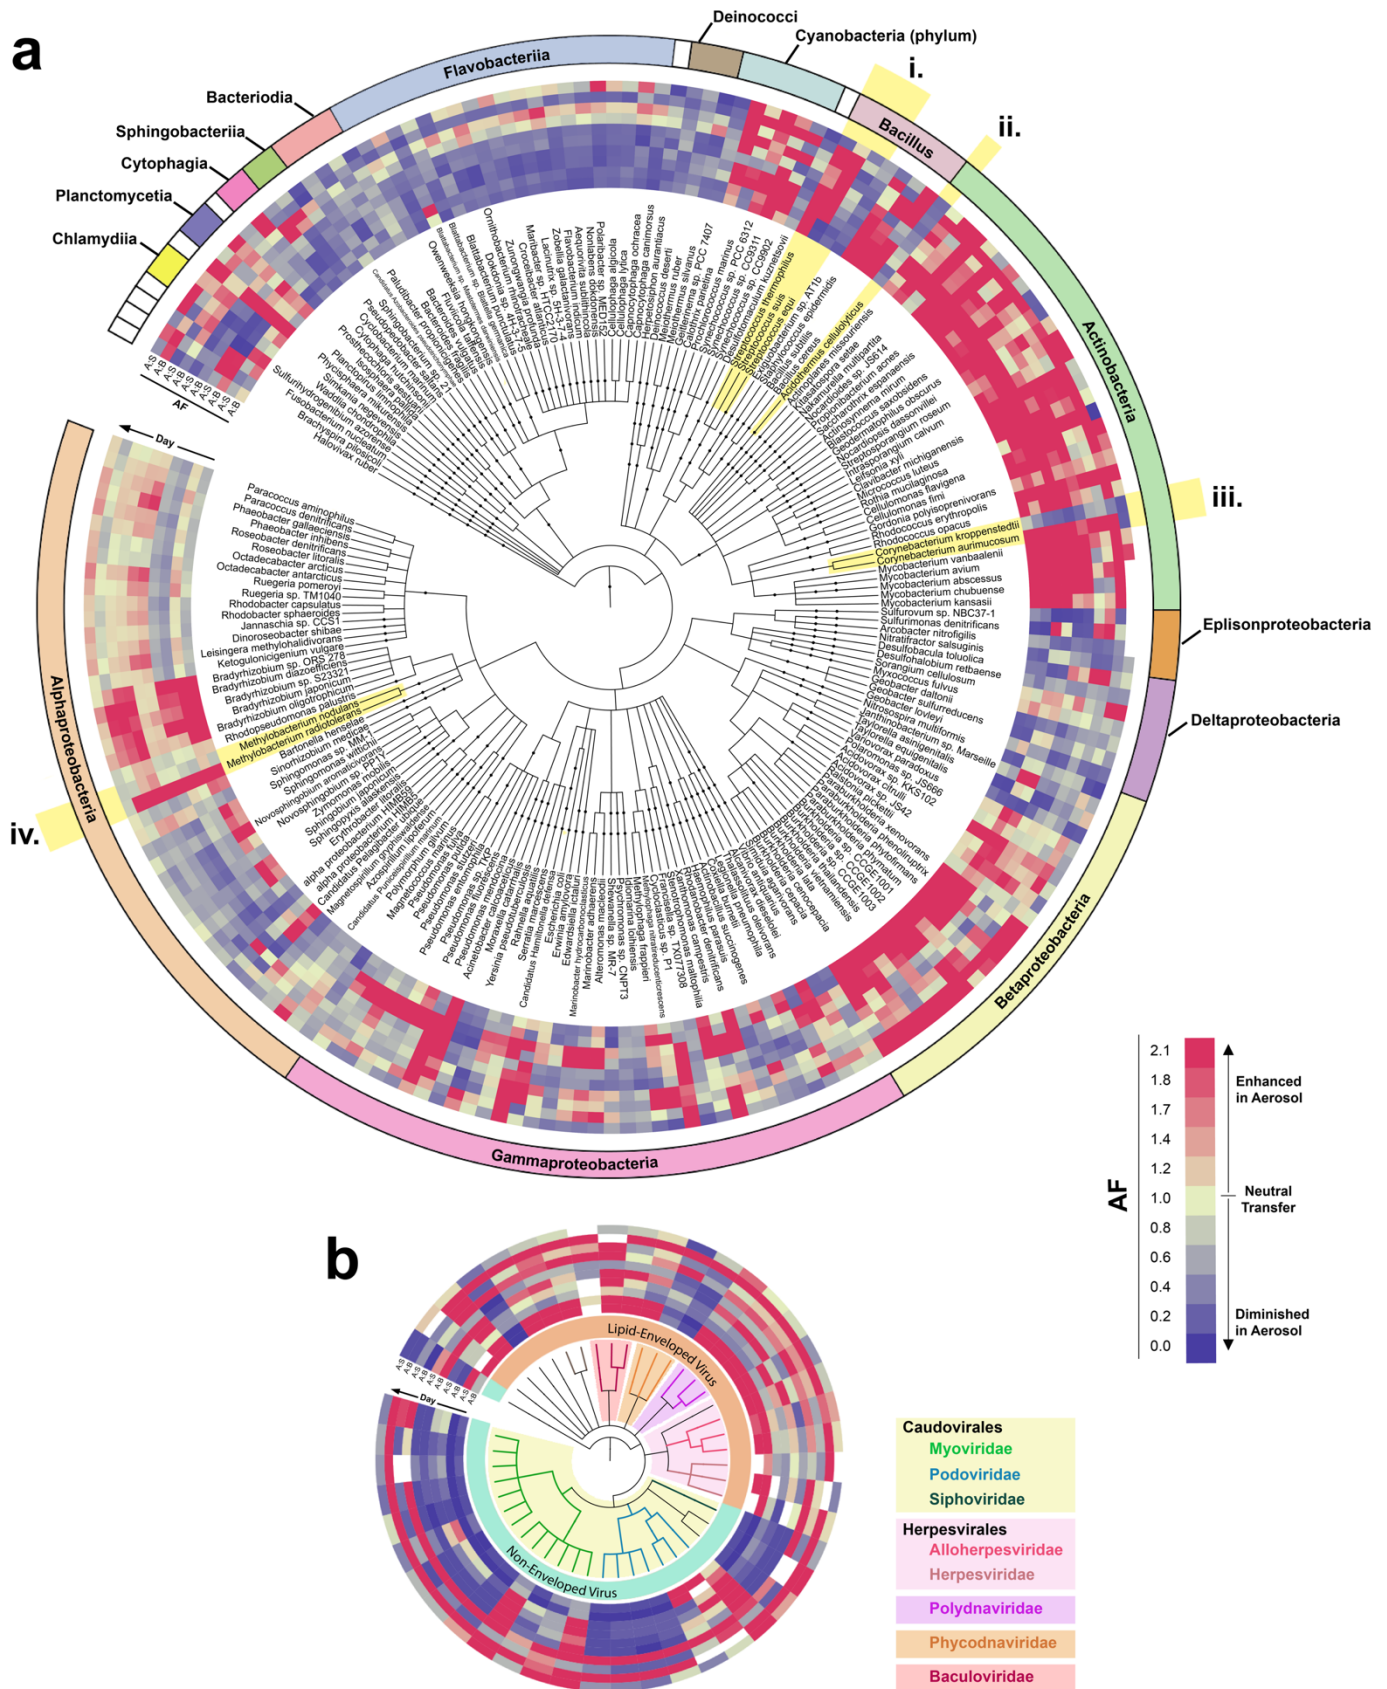

**Supplementary Fig. 6** The genetic basis of bacterial and viral aerosolization in the abundance trimmed data set. Genome-based phylogenetic trees based on 197 bacterial genome sequences in **a** and 46 viral genomes in **b**. Sequences are derived from read-centric analysis of above 0.1% of the population but not trimmed of genomes with low spatial coverage. The bacteria are a subset of this data that contains 700 bacterial genomes total. The heatmaps display aerosolization factor (AF), A:B and A:S, on different days. AF intensity specified by the legend: Blue = Diminished aerosolization; Yellow = Neutral aerosolization; Red = Enhanced aerosolization. **a**, Bacteria class is indicated on outer ring to further denote species and aerosolization relationships. Yellow highlights, i–iv indicate closely related species with differing aerosolization patterns. **b**, Line colors denote viral family and shading indicates order as shown by legend. Additionally, labels on the inner ring specify lipid-enveloped or non-enveloped classifications. Blanks indicate samples below threshold limits.



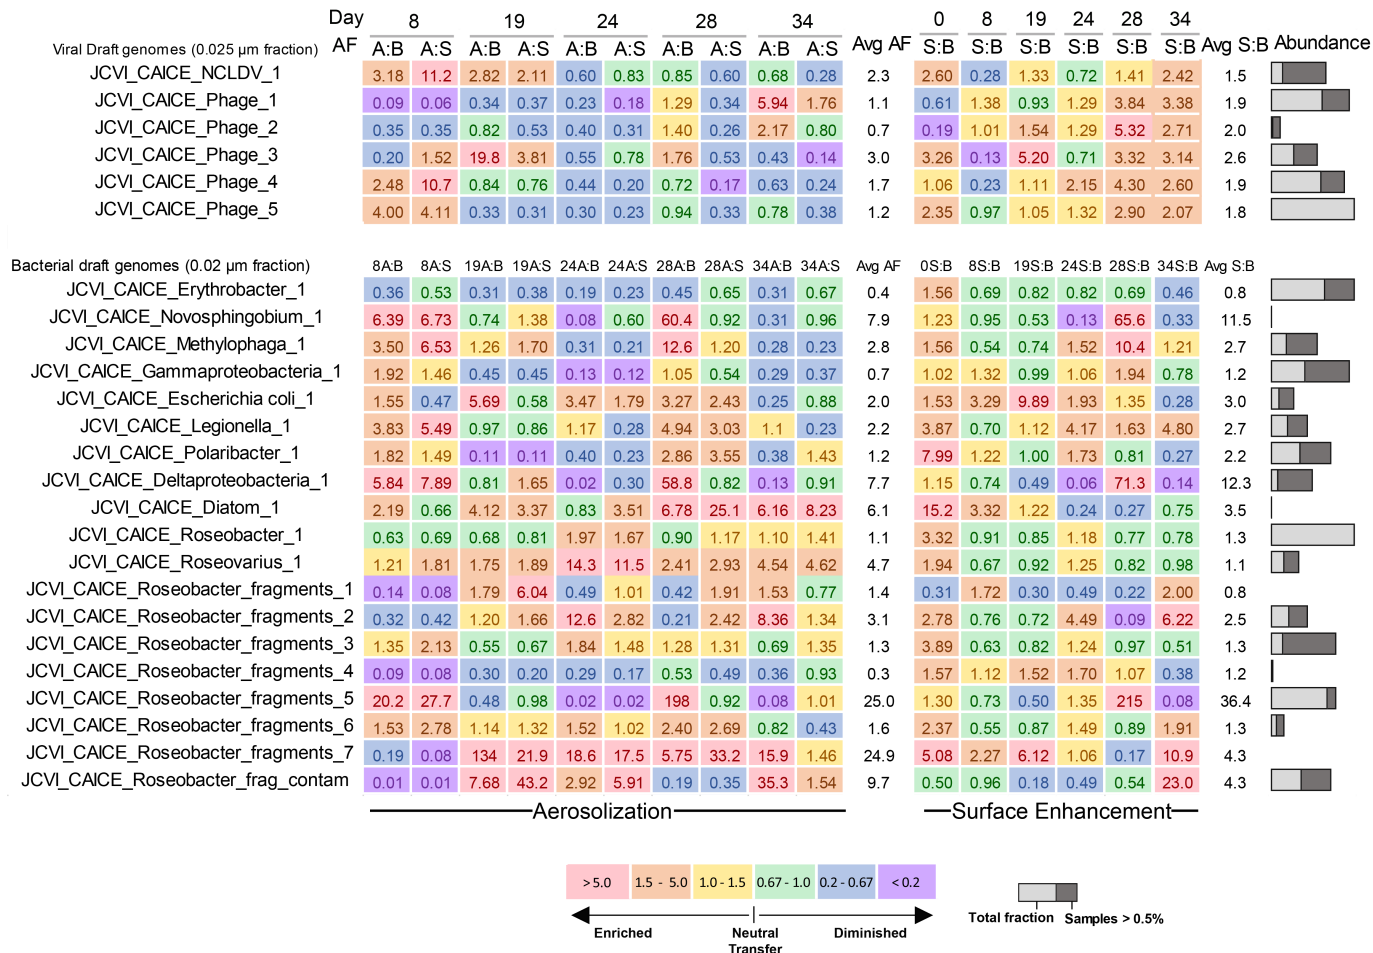

**Supplementary Fig. 7** Draft genome bacterial and viral aerosolization and surface enrichment. Taxonomy, aerosolization factors, and surface enrichment of assembled draft genomes. Heat map column labels indicate day and measurement. Aerosolization factor is expressed as the fraction of species in aerosol to bulk or surface (A:B or A:S). Surface enrichment is the fraction in SSML to the fraction in the bulk (S:B). Heat map values indicate ratio values (bottom legend). Genome abundance is reported as the sum of fraction of the population across the experiment and as the number of samples above 0.5% of the population.

**a**

| Order               | Class               | Phylum         |
|---------------------|---------------------|----------------|
| Corynebacteriales   | Actinobacteria      | Actinobacteria |
| Corynebacteriales   | Actinobacteria      | Actinobacteria |
| Micrococcales       | Actinobacteria      | Actinobacteria |
| Micrococcales       | Actinobacteria      | Actinobacteria |
| Propionibacteriales | Actinobacteria      | Actinobacteria |
| Lactobacillales     | Bacilli             | Firmicutes     |
| Rhizobiales         | Alphaproteobacteria | Proteobacteria |
| Corynebacteriales   | Actinobacteria      | Actinobacteria |
| Corynebacteriales   | Actinobacteria      | Actinobacteria |
| Corynebacteriales   | Actinobacteria      | Actinobacteria |
| Corynebacteriales   | Actinobacteria      | Actinobacteria |
| Geodermatophilales  | Actinobacteria      | Actinobacteria |
| Micrococcales       | Actinobacteria      | Actinobacteria |
| Micrococcales       | Actinobacteria      | Actinobacteria |
| Micrococcales       | Actinobacteria      | Actinobacteria |
| Micrococcales       | Actinobacteria      | Actinobacteria |
| Nakamurellales      | Actinobacteria      | Actinobacteria |
| Propionibacteriales | Actinobacteria      | Actinobacteria |
| Pseudonocardiales   | Actinobacteria      | Actinobacteria |
| Pseudonocardiales   | Actinobacteria      | Actinobacteria |
| Chroococcales       |                     | Cyanobacteria  |
| Chroococcales       |                     | Cyanobacteria  |
| Nostocales          |                     | Cyanobacteria  |
| Bacillales          | Bacilli             | Firmicutes     |
| Phycisphaerales     | Phycisphaerae       | Planctomycetes |
| Rhizobiales         | Alphaproteobacteria | Proteobacteria |
| Burkholderiales     | Betaproteobacteria  | Proteobacteria |
| Burkholderiales     | Betaproteobacteria  | Proteobacteria |
| Burkholderiales     | Betaproteobacteria  | Proteobacteria |
| Burkholderiales     | Betaproteobacteria  | Proteobacteria |
| Burkholderiales     | Betaproteobacteria  | Proteobacteria |
| Burkholderiales     | Betaproteobacteria  | Proteobacteria |
| Enterobacteriales   | Gammaproteobacteria | Proteobacteria |
| Pseudomonadales     | Gammaproteobacteria | Proteobacteria |
| Thiotrichales       | Gammaproteobacteria | Proteobacteria |
| Micrococcales       | Actinobacteria      | Actinobacteria |
| Streptosporangiales | Actinobacteria      | Actinobacteria |
| Bacillales          | Bacilli             | Firmicutes     |
| Bacillales          | Bacilli             | Firmicutes     |
| Lactobacillales     | Bacilli             | Firmicutes     |
| Rhizobiales         | Alphaproteobacteria | Proteobacteria |
| Rhizobiales         | Alphaproteobacteria | Proteobacteria |
| Burkholderiales     | Betaproteobacteria  | Proteobacteria |
| Burkholderiales     | Betaproteobacteria  | Proteobacteria |
| Burkholderiales     | Betaproteobacteria  | Proteobacteria |
| Pseudomonadales     | Gammaproteobacteria | Proteobacteria |
| Corynebacteriales   | Actinobacteria      | Actinobacteria |
| Corynebacteriales   | Actinobacteria      | Actinobacteria |
| Micromonosporales   | Actinobacteria      | Actinobacteria |
| Streptomyetales     | Actinobacteria      | Actinobacteria |
| Streptosporangiales | Actinobacteria      | Actinobacteria |
| Planctomycetales    | Planctomycetia      | Planctomycetes |
| Rhizobiales         | Alphaproteobacteria | Proteobacteria |
| Burkholderiales     | Betaproteobacteria  | Proteobacteria |
| Burkholderiales     | Betaproteobacteria  | Proteobacteria |
| Burkholderiales     | Betaproteobacteria  | Proteobacteria |
| Geodermatophilales  | Actinobacteria      | Actinobacteria |
| Rhizobiales         | Alphaproteobacteria | Proteobacteria |
| Burkholderiales     | Betaproteobacteria  | Proteobacteria |
| Burkholderiales     | Betaproteobacteria  | Proteobacteria |
| Enterobacteriales   | Gammaproteobacteria | Proteobacteria |
| Oceanospirillales   | Gammaproteobacteria | Proteobacteria |
| Pseudomonadales     | Gammaproteobacteria | Proteobacteria |
| Pseudomonadales     | Gammaproteobacteria | Proteobacteria |
| Xanthomonadales     | Gammaproteobacteria | Proteobacteria |
| Corynebacteriales   | Actinobacteria      | Actinobacteria |

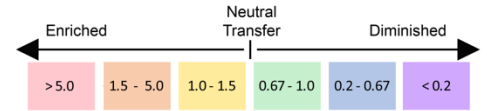

| Species                                                      | Aerosolization |      |       |       |       |       |       |       | Surface Enhancement |       |      |      |       |       | AVG |       |       |
|--------------------------------------------------------------|----------------|------|-------|-------|-------|-------|-------|-------|---------------------|-------|------|------|-------|-------|-----|-------|-------|
|                                                              | 8A:B           | 8A:S | 19A:B | 19A:S | 24A:B | 24A:S | 28A:B | 28A:S | 34A:B               | 34A:S | 0S:B | 8S:B | 19S:B | 24S:B |     | 28S:B | 34S:B |
| <i>Rhodococcus sp. (Rhodococcus erythropolis)</i>            | 5.7            | 3.3  | 2.3   | 2.4   | 2.0   | 1.8   | 3.7   | 2.0   | 14.9                | 10.0  | 3.2  | 1.7  | 1.0   | 1.1   | 1.8 | 1.5   | 1.7   |
| <i>Corynebacterium sp. (Corynebacterium aurimucosum)</i>     | 9.5            | 9.0  | 14.0  | 14.8  | 2.4   | 1.7   | 2.2   | 6.9   | 3.7                 | 0.2   | 2.6  | 1.1  | 1.0   | 1.4   | 0.3 | 19.9  | 4.4   |
| <i>Clavibacter sp. (Clavibacter michiganensis)</i>           | 5.1            | 7.6  | 8.8   | 7.7   | 1.6   | 2.2   | 2.0   | 2.7   | 3.0                 | 0.8   | 1.0  | 0.7  | 1.1   | 0.8   | 0.7 | 3.9   | 1.4   |
| <i>Leifsonia sp. (Leifsonia xyli)</i>                        | 6.0            | 10.2 | 3.1   | 3.0   | 2.2   | 2.0   | 3.0   | 2.3   | 2.3                 | 0.8   | 5.3  | 0.6  | 1.0   | 1.1   | 1.3 | 2.8   | 2.0   |
| <i>Propionibacterium sp. (Propionibacterium acnes)</i>       | 38.5           | 26.9 | 20.5  | 16.8  | 12.2  | 3.1   | 23.6  | 10.2  | 14.4                | 0.6   | 2.4  | 1.4  | 1.2   | 3.9   | 2.3 | 23.9  | 5.9   |
| <i>Streptococcus sp. (Streptococcus thermophilus)</i>        | 20.5           | 50.3 | 10.1  | 5.7   | 4.3   | 1.5   | 1.6   | 2.1   | 10.2                | 0.2   | 0.1  | 0.4  | 1.8   | 2.8   | 0.7 | 41.9  | 8.0   |
| <i>Methylobacterium sp. (Methylobacterium radiotolerans)</i> | 3.9            | 2.9  | 7.3   | 6.3   | 3.7   | 3.5   | 2.2   | 2.1   | 3.2                 | 0.8   | 2.4  | 1.3  | 1.2   | 1.0   | 1.1 | 3.9   | 1.8   |
| <i>Mycobacterium sp. (Mycobacterium avium)</i>               | 5.6            | 6.0  | 11.2  | 10.7  | 3.1   | 6.3   | 0.5   | 1.1   | 5.3                 | 1.9   | 0.9  | 0.9  | 1.0   | 0.5   | 0.5 | 2.8   | 1.1   |
| <i>Mycobacterium sp. (Mycobacterium abscessus)</i>           | 4.6            | 3.3  | 6.5   | 6.9   | 10.6  | 3.4   | 1.2   | 1.9   | 5.8                 | 1.2   | 0.8  | 1.4  | 0.9   | 3.1   | 0.6 | 4.9   | 2.0   |
| <i>Mycobacterium sp. (Mycobacterium chubuense)</i>           | 3.5            | 5.3  | 7.4   | 10.8  | 2.9   | 3.0   | 0.5   | 0.6   | 9.0                 | 2.0   | 1.7  | 0.7  | 0.7   | 1.0   | 0.8 | 4.5   | 1.6   |
| <i>Mycobacterium sp. (Mycobacterium vanbaalenii)</i>         | 2.3            | 2.2  | 3.9   | 3.8   | 2.6   | 2.9   | 1.7   | 1.2   | 3.8                 | 1.2   | 0.1  | 1.1  | 1.0   | 0.9   | 1.4 | 3.1   | 1.3   |
| <i>Blastococcus sp. (Blastococcus saxosidens)</i>            | 2.3            | 1.9  | 24.2  | 25.5  | 2.5   | 3.2   | 1.6   | 1.3   | 2.6                 | 0.2   | 1.8  | 1.2  | 0.9   | 0.8   | 1.2 | 12.5  | 3.1   |
| <i>Rothia sp. (Rothia mucilaginoso)</i>                      | 1.1            | 4.8  | 212   | 246   | 4.0   | 4.5   | 19.0  | 3.9   | 3.3                 | 0.0   | 1    | 0    | 0.9   | 0.9   | 4.9 | ####  | 22.7  |
| <i>Micrococcus sp. (Micrococcus luteus)</i>                  | 13.9           | 9.0  | 26.4  | 18.7  | 10.8  | 6.0   | 1.4   | 1.7   | 9.2                 | 1.0   | 0.5  | 1.5  | 1.4   | 1.8   | 0.8 | 9.1   | 2.5   |
| <i>Cellulomonas sp. (Cellulomonas flavigena)</i>             | 2.4            | 1.9  | 8.5   | 6.0   | 2.1   | 2.8   | 1.0   | 1.2   | 6.9                 | 2.1   | 2.0  | 1.3  | 1.4   | 0.7   | 0.9 | 3.2   | 1.6   |
| <i>Cellulomonas sp. (Cellulomonas fimi)</i>                  | 3.6            | 3.0  | 4.2   | 4.0   | 1.8   | 2.4   | 0.8   | 0.9   | 3.1                 | 1.7   | 2.1  | 1.2  | 1.1   | 0.7   | 0.9 | 1.9   | 1.3   |
| <i>Nakamurella sp. (Nakamurella multipartita)</i>            | 0.9            | 0.8  | 3.6   | 3.6   | 2.5   | 2.9   | 2.9   | 2.7   | 6.3                 | 2.7   | 2.9  | 1.1  | 0.9   | 1.1   | 1.4 | 2.4   | 1.5   |
| <i>Nocardioides sp. (Nocardioides sp. JS614)</i>             | 3.9            | 4.3  | 7.7   | 8.7   | 1.6   | 1.7   | 1.7   | 1.1   | 5.1                 | 1.1   | 2.2  | 0.9  | 1.0   | 1.5   | 4.8 | 1.9   | 1.3   |
| <i>Saccharothrix sp. (Saccharothrix espanaensis)</i>         | 2.2            | 2.4  | 4.9   | 6.1   | 1.8   | 4.2   | 0.9   | 1.2   | 4.6                 | 1.7   | 0.7  | 1.9  | 0.8   | 0.4   | 0.8 | 2.7   | 1.2   |
| <i>Actinosynnema sp. (Actinosynnema mirum)</i>               | 2.5            | 1.5  | 3.9   | 4.2   | 1.4   | 1.5   | 2.7   | 2.0   | 2.7                 | 0.7   | 2.6  | 1.6  | 0.9   | 0.9   | 1.3 | 3.6   | 1.8   |
| <i>Synechococcus sp. (Synechococcus sp. CC9311)</i>          | 5.9            | 7.2  | 9.4   | 11.6  | 3.2   | 0.9   | 7.9   | 0.9   | 10.2                | 1.5   | 0.1  | 0.8  | 0.8   | 3.6   | 9.2 | 6.7   | 3.5   |
| <i>Synechococcus sp. (Synechococcus sp. PCC 6312)</i>        | 1.9            | 1.6  | 2.8   | 2.7   | 0.6   | 1.6   | 1.4   | 1.8   | 6.6                 | 4.3   | 6.5  | 1.2  | 1.0   | 0.4   | 0.8 | 1.5   | 1.9   |
| <i>Calothrix sp. (Calothrix parietina)</i>                   | 1.3            | 1.5  | 2.9   | 2.3   | 0.6   | 2.3   | 3.1   | 2.9   | 2.8                 | 2.9   | 2.3  | 0.8  | 1.3   | 0.3   | 1.1 | 0.9   | 1.1   |
| <i>Bacillus sp. (Bacillus cereus)</i>                        | 204            | 16.0 | 4.0   | 4.6   | 0.5   | 0.7   | 4.6   | 10.0  | 9.6                 | 3.7   | 4.8  | 12.7 | 0.9   | 0.8   | 0.5 | 2.6   | 3.7   |
| <i>Phycisphaera sp. (Phycisphaera mikurensis)</i>            | 2.6            | 2.2  | 2.7   | 3.0   | 2.4   | 2.8   | 1.1   | 1.1   | 3.5                 | 4.5   | 1.9  | 1.2  | 0.9   | 0.9   | 1.0 | 0.8   | 1.1   |
| <i>Bradyrhizobium sp. (Bradyrhizobium diazoefficiens)</i>    | 3.3            | 3.8  | 1.8   | 1.9   | 1.1   | 1.1   | 3.2   | 2.9   | 2.3                 | 1.5   | 3.1  | 0.9  | 1.0   | 1.0   | 1.1 | 1.5   | 1.4   |
| <i>Burkholderia sp. (Burkholderia phytofirmans)</i>          | 70.4           | 41.8 | 5.8   | 5.3   | 0.7   | 0.2   | 1.8   | 1.8   | 24.0                | 5.2   | 2.3  | 1.7  | 1.1   | 2.9   | 1.0 | 4.6   | 2.3   |
| <i>Burkholderia sp. (Burkholderia sp. CCGE1002)</i>          | 14.4           | 16.6 | 5.0   | 4.8   | 0.9   | 0.6   | 2.3   | 2.1   | 7.5                 | 2.6   | 3.4  | 0.9  | 1.0   | 1.4   | 1.1 | 2.9   | 1.8   |
| <i>Burkholderia sp. (Burkholderia lata)</i>                  | 7.3            | 5.2  | 1.9   | 2.2   | 2.4   | 1.6   | 1.5   | 1.3   | 5.1                 | 8.7   | 1.2  | 1.4  | 0.9   | 1.5   | 1.1 | 0.6   | 1.1   |
| <i>Burkholderia sp. (Burkholderia cepacia)</i>               | 4.9            | 5.4  | 3.2   | 3.5   | 6.5   | 1.5   | 1.0   | 0.6   | 8.3                 | 2.2   | 0.5  | 0.9  | 0.9   | 4.3   | 1.8 | 3.7   | 2.0   |
| <i>Burkholderia sp. (Burkholderia thailandensis)</i>         | 6.3            | 4.5  | 2.1   | 1.8   | 1.5   | 1.5   | 0.9   | 3.4   | 2.7                 | 1.9   | 1.4  | 1.2  | 1.0   | 0.6   | 1.3 | 1.4   | 1.4   |
| <i>Candidatus sp. (Candidatus Hamiltonea defensa)</i>        | 1.0            | 1.6  | 3.1   | 3.9   | 0.6   | 1.8   | 3.8   | 2.4   | 4.2                 | 3.4   | 1.6  | 0.6  | 0.8   | 1.3   | 1.2 | 1.0   | 1.0   |
| <i>Acinetobacter sp. (Acinetobacter calcoaceticus)</i>       | 19.2           | 60.4 | 3.2   | 3.0   | 2.7   | 2.9   | 1.6   | 2.2   | 1.4                 | 0.9   | 1.0  | 0.3  | 1.1   | 0.9   | 0.7 | 1.5   | 0.9   |
| <i>Cycloclasticus sp. (Cycloclasticus sp. P1)</i>            | 0.7            | 0.6  | 3.5   | 2.9   | 3.3   | 2.3   | 1.7   | 1.8   | 4.0                 | 2.7   | 2.8  | 1.2  | 1.2   | 1.4   | 0.9 | 1.4   | 1.5   |
| <i>Intrasporangium sp. (Intrasporangium calvum)</i>          | 2.8            | 1.8  | 4.7   | 5.3   | 1.7   | 1.2   | 1.1   | 0.8   | 2.3                 | 2.4   | 1.5  | 1.6  | 0.9   | 1.3   | 1.4 | 1.0   | 1.3   |
| <i>Nocardiopsis sp. (Nocardiopsis dassonvillei)</i>          | 1.8            | 3.4  | 4.1   | 6.6   | 1.0   | 1.7   | 2.2   | 1.4   | 1.9                 | 1.2   | 0.7  | 0.5  | 0.6   | 0.6   | 1.6 | 1.6   | 0.9   |
| <i>Bacillus sp. (Bacillus subtilis)</i>                      | 18.2           | 5.4  | 2.9   | 1.9   | 1.8   | 0.3   | 4.9   | 4.6   | 0.2                 | 0.7   | 2.0  | 3.4  | 1.5   | 7.1   | 1.1 | 0.3   | 2.6   |
| <i>Staphylococcus sp. (Staphylococcus epidermidis)</i>       | 7.7            | 7.4  | 5.1   | 3.4   | 2.9   | 1.8   | 1.0   | 1.0   | 2.1                 | 0.3   | 1.0  | 1.0  | 1.5   | 1.6   | 1.0 | 6.9   | 2.2   |
| <i>Streptococcus sp. (Streptococcus suis)</i>                | 0.1            | 0.1  | 14.1  | 14.2  | 7.3   | 6.3   | 2.2   | 3.4   | 12.8                | 1.1   | 1.2  | 1.4  | 1.0   | 1.2   | 0.6 | 11.5  | 2.8   |
| <i>Bradyrhizobium sp. (Bradyrhizobium japonicum)</i>         | 3.1            | 3.2  | 2.2   | 2.0   | 1.2   | 1.2   | 2.3   | 1.8   | 1.6                 | 1.1   | 2.8  | 1.0  | 1.1   | 1.0   | 1.2 | 1.4   | 1.4   |
| <i>Bradyrhizobium sp. (Bradyrhizobium sp. S23321)</i>        | 3.0            | 2.9  | 1.7   | 1.6   | 1.4   | 1.2   | 1.9   | 2.1   | 2.0                 | 1.2   | 2.7  | 1.0  | 1.0   | 1.2   | 0.9 | 1.6   | 1.4   |
| <i>Burkholderia sp. (Burkholderia phenoliruptrix)</i>        | 24.5           | 15.5 | 4.9   | 4.9   | 1.7   | 0.7   | 0.6   | 0.4   | 19.2                | 4.8   | 0.3  | 1.6  | 1.0   | 2.2   | 1.8 | 4.0   | 1.8   |
| <i>Burkholderia sp. (Burkholderia cenocepacia)</i>           | 8.3            | 7.7  | 2.9   | 2.8   | 1.1   | 1.0   | 1.6   | 1.5   | 3.7                 | 2.3   | 1.7  | 1.1  | 1.0   | 1.1   | 1.1 | 1.6   | 1.3   |
| <i>Acidovorax sp. (Acidovorax sp. KKS102)</i>                | 2.4            | 2.6  | 2.7   | 2.4   | 1.4   | 1.3   | 1.6   | 1.6   | 1.8                 | 0.6   | 1.4  | 0.9  | 1.1   | 1.1   | 1.0 | 3.2   | 1.5   |
| <i>Pseudomonas sp. (Pseudomonas mendocina)</i>               | 0.5            | 0.4  | 6.7   | 5.2   | 2.6   | 2.9   | 2.3   | 2.3   | 7.2                 | 1.4   | 1.0  | 1.2  | 1.3   | 0.9   | 1.0 | 5.3   | 1.8   |
| <i>Mycobacterium sp. (Mycobacterium kansasii)</i>            | 6.2            | 4.6  | 2.7   | 2.2   | 1.3   | 1.5   | 1.0   | 1.3   | 3.3                 | 2.5   | 0.7  | 1.3  | 1.2   | 0.9   | 0.8 | 1.3   | 1.0   |
| <i>Rhodococcus sp. (Rhodococcus opacus)</i>                  | 2.1            | 1.3  | 2.6   | 2.5   | 2.0   | 1.5   | 1.3   | 0.7   | 4.4                 | 1.2   | 2.2  | 1.6  | 1.1   | 1.3   | 1.8 | 3.8   | 2.0   |
| <i>Actinoplanes sp. (Actinoplanes missouriensis)</i>         | 1.5            | 1.2  | 5.0   | 3.7   | 1.0   | 1.3   | 2.4   | 1.7   | 2.7                 | 1.0   | 1.3  | 1.3  | 1.3   | 0.8   | 1.4 | 2.8   | 1.5   |
| <i>Kitasatospora sp. (Kitasatospora setae)</i>               | 1.9            | 2.4  | 4.8   | 5.9   | 1.4   | 1.5   | 1.4   | 0.7   | 3.6                 | 2.5   | 0.4  | 0.8  | 0.8   | 1.0   | 1.9 | 1.5   | 1.1   |
| <i>Streptosporangium sp. (Streptosporangium roseum)</i>      | 1.4            | 1.6  | 3.2   | 3.0   | 0.9   | 1.6   | 1.1   | 1.5   | 4.4                 | 3.2   | 2.0  | 0.9  | 1.0   | 0.6   | 0.8 | 1.4   | 1.1   |
| <i>Isophaera sp. (Isophaera pallida)</i>                     | 1.7            | 1.4  | 1.6   | 2.1   | 1.0   | 1.5   | 1.2   | 1.6   | 1.4                 | 1.4   | 1.9  | 1.2  | 0.7   | 0.6   | 0.8 | 0.3   | 0.9   |
| <i>Bradyrhizobium sp. (Bradyrhizobium sp. ORS 278)</i>       | 2.5            | 2.4  | 2.4   | 2.5   | 1.1   | 1.1   | 1.9   | 1.9   | 1.4                 | 1.0   | 2.5  | 1.1  | 1.0   | 1.0   | 1.0 | 1.4   | 1.3   |
| <i>Burkholderia sp. (Burkholderia xenovorans)</i>            | 23.8           | 18.5 | 3.7   | 3.8   | 0.9   | 0.4   | 1.1   | 1.0   | 9.7                 | 3.5   | 2.6  | 1.3  | 1.0   | 2.3   | 1.1 | 2.8   | 1.8   |
| <i>Burkholderia sp. (Burkholderia phymatum)</i>              | 14.1           | 13.6 | 2.0   | 2.2   | 0.9   | 0.6   | 1.1   | 0.8   | 3.2                 | 1.8   | 2.2  | 1.0  | 0.9   | 1.4   | 1.7 | 1.5   | 1.5   |
| <i>Burkholderia sp. (Burkholderia sp. CCGE1003)</i>          | 8.2            | 7.3  | 3.0   | 2.6   | 0.6   | 0.4   | 1.4   | 0.9   | 5.1                 | 2.5   | 1.7  | 1.1  | 1.2   | 1.5   | 1.6 | 2.0   | 2.5   |
| <i>Geodermatophilus sp. (Geodermatophilus obscurus)</i>      | 2.2            | 2.2  | 12.5  | 10.1  | 1.4   | 1.4   | 1.1   | 1.1   | 1.7                 | 0.2   | 0.7  | 1.0  | 1.2   | 1.0   | 1.1 | 8.6   | 2.3   |
| <i>Bradyrhizobium sp. (Bradyrhizobium oligotrophicum)</i>    | 2.2            | 2.2  | 1.3   | 1.2   | 1.3   | 1.2   | 2.0   | 1.8   | 1.6                 | 1.3   | 2.4  | 1.0  | 1.1   | 1.0   | 1.1 | 1.2   | 1.3   |
| <i>Burkholderia sp. (Burkholderia sp. CCGE1001)</i>          | 22.4           | 55.0 | 1.5   | 1.3   | 1.2   | 0.9   | 1.9   | 1.8   | 6.1                 | 1.1   | 3.4  | 0.4  | 1.2   | 1.3   | 1.1 | 5.6   | 2.2   |
| <i>Acidovorax sp. (Acidovorax sp. JS42)</i>                  | 1.1            | 1.4  | 2.2   | 1.8   | 1.8   | 2.1   | 1.8   | 1.2   | 1.2                 | 0.3   | 1.1  | 0.8  | 1.2   |       |     |       |       |

**b**

| Order             | Class               | Phylum         | Species                                                                  | Enriched       |      |       |       |       |           |       |       |       |       |           |      |       |       |       | Neutral Transfer    |       |       |       |       | Diminished |  |  |  |  | Species abundance |
|-------------------|---------------------|----------------|--------------------------------------------------------------------------|----------------|------|-------|-------|-------|-----------|-------|-------|-------|-------|-----------|------|-------|-------|-------|---------------------|-------|-------|-------|-------|------------|--|--|--|--|-------------------|
|                   |                     |                |                                                                          | >5.0           |      |       |       |       | 1.5 - 5.0 |       |       |       |       | 1.0 - 1.5 |      |       |       |       | 0.67 - 1.0          |       |       |       |       | 0.2 - 0.67 |  |  |  |  |                   |
|                   |                     |                |                                                                          | Aerosolization |      |       |       |       |           |       |       |       |       |           |      |       |       |       | Surface Enhancement |       |       |       |       |            |  |  |  |  |                   |
|                   |                     |                |                                                                          | 8A:B           | 8A:S | 19A:B | 19A:S | 24A:B | 24A:S     | 28A:B | 28A:S | 34A:B | 34A:S | 05:B      | 05:S | 195:B | 195:S | 245:B | 245:S               | 285:B | 285:S | 345:B | 345:S | AVG        |  |  |  |  |                   |
| Chroococcales     |                     | Cyanobacteria  | <i>Synechococcus</i> sp. ( <i>Synechococcus</i> sp. CC9902)              | 1.3            | 2.0  | 17.9  | 11.5  | 0.9   | 0.2       | 13.8  | 0.3   | 6.8   | 0.4   | 0.1       | 0.6  | 1.6   | 4.5   | 40.6  | 17.2                | 10.8  |       |       |       |            |  |  |  |  |                   |
| Prochlorales      |                     | Cyanobacteria  | <i>Prochlorococcus</i> sp. ( <i>Prochlorococcus marinus</i> )            | 0.4            | 0.4  | 2.1   | 1.9   | 0.5   | 0.9       | 2.1   | 1.0   | 2.2   | 1.1   | 0.1       | 1.1  | 1.1   | 0.6   | 2.2   | 1.9                 | 1.2   |       |       |       |            |  |  |  |  |                   |
|                   | Alphaproteobacteria | Proteobacteria | <i>Candidatus</i> sp. ( <i>Candidatus Pelagibacter ubique</i> )          | 2.7            | 1.7  | 6.0   | 3.8   | 0.2   | 0.1       | 1.0   | 0.2   | 1.1   | 0.4   | 0.1       | 1.6  | 1.6   | 1.7   | 4.5   | 2.6                 | 2.0   |       |       |       |            |  |  |  |  |                   |
| Burkholderiales   | Betaproteobacteria  | Proteobacteria | <i>Burkholderia</i> sp. ( <i>Burkholderia vietnamiensis</i> )            | 8.2            | 6.1  | 1.3   | 1.2   | 0.6   | 0.5       | 0.4   | 0.5   | 5.7   | 5.8   | 0.6       | 1.3  | 1.1   | 1.0   | 0.9   | 1.0                 | 1.0   |       |       |       |            |  |  |  |  |                   |
| Xanthomonadales   | Gammaproteobacteria | Proteobacteria | <i>Rhodanobacter</i> sp. ( <i>Rhodanobacter denitrificans</i> )          | 16.4           | 12.6 | 12.2  | 11.1  | 0.7   | 0.6       | 1.4   | 1.4   | 1.0   | 0.7   | 1.2       | 1.3  | 1.1   | 1.3   | 0.9   | 1.5                 | 1.2   |       |       |       |            |  |  |  |  |                   |
| Xanthomonadales   | Gammaproteobacteria | Proteobacteria | <i>Stenotrophomonas</i> sp. ( <i>Stenotrophomonas maltophilia</i> )      | 1.9            | 2.0  | 4.2   | 3.7   | 0.9   | 1.0       | 1.0   | 0.7   | 1.0   | 0.4   | 1.6       | 0.9  | 1.1   | 0.9   | 1.3   | 2.7                 | 1.4   |       |       |       |            |  |  |  |  |                   |
| Rhodobacterales   | Alphaproteobacteria | Proteobacteria | <i>Phaeobacter</i> sp. ( <i>Phaeobacter inhibens</i> )                   | 0.8            | 1.1  | 0.6   | 0.7   | 2.0   | 1.8       | 1.2   | 1.2   | 1.0   | 1.4   | 2.4       | 0.7  | 0.9   | 1.1   | 1.0   | 0.7                 | 1.1   |       |       |       |            |  |  |  |  |                   |
| Rhodobacterales   | Alphaproteobacteria | Proteobacteria | <i>Leisingera</i> sp. ( <i>Leisingera methylhalodivorans</i> )           | 0.8            | 1.2  | 0.5   | 0.6   | 1.8   | 1.7       | 1.2   | 1.2   | 1.0   | 1.4   | 3.1       | 0.6  | 0.8   | 1.0   | 1.0   | 0.7                 | 1.2   |       |       |       |            |  |  |  |  |                   |
| Rhodobacterales   | Alphaproteobacteria | Proteobacteria | <i>Ruegeria</i> sp. ( <i>Ruegeria</i> sp. TM1040)                        | 0.9            | 1.5  | 0.6   | 0.7   | 1.5   | 1.5       | 1.1   | 1.0   | 1.0   | 1.3   | 2.3       | 0.6  | 0.8   | 1.0   | 1.1   | 0.8                 | 1.1   |       |       |       |            |  |  |  |  |                   |
| Rhodobacterales   | Alphaproteobacteria | Proteobacteria | <i>Ruegeria</i> sp. ( <i>Ruegeria pomeroyi</i> )                         | 0.8            | 1.3  | 0.5   | 0.6   | 1.8   | 1.7       | 1.3   | 1.2   | 1.0   | 1.6   | 3.4       | 0.6  | 0.8   | 1.1   | 1.0   | 0.7                 | 1.3   |       |       |       |            |  |  |  |  |                   |
| Burkholderiales   | Betaproteobacteria  | Proteobacteria | <i>Acidovorax</i> sp. ( <i>Acidovorax citrulli</i> )                     | 1.1            | 1.0  | 1.9   | 2.0   | 1.4   | 1.3       | 1.2   | 1.2   | 2.3   | 0.9   | 1.4       | 1.1  | 1.0   | 1.1   | 0.9   | 2.6                 | 1.4   |       |       |       |            |  |  |  |  |                   |
| Myxococcales      | Deltaproteobacteria | Proteobacteria | <i>Sorangium</i> sp. ( <i>Sorangium cellulosum</i> )                     | 1.1            | 0.9  | 1.4   | 1.4   | 1.1   | 1.6       | 0.8   | 0.7   | 15.8  | 9.1   | 0.5       | 1.3  | 1.0   | 0.6   | 1.2   | 1.7                 | 1.1   |       |       |       |            |  |  |  |  |                   |
| Rhizobiales       | Alphaproteobacteria | Proteobacteria | <i>Bartonella</i> sp. ( <i>Bartonella henselae</i> )                     | 1.6            | 1.7  | 1.0   | 1.2   | 0.6   | 0.6       | 0.7   | 0.7   | 0.8   | 1.1   | 1.2       | 0.9  | 0.8   | 1.2   | 1.1   | 0.8                 | 1.0   |       |       |       |            |  |  |  |  |                   |
| Legionellales     | Gammaproteobacteria | Proteobacteria | <i>Legionella</i> sp. ( <i>Legionella pneumophila</i> )                  | 1.7            | 2.7  | 0.8   | 0.7   | 0.4   | 0.3       | 1.0   | 0.9   | 0.7   | 0.3   | 1.2       | 0.6  | 1.1   | 1.2   | 0.9   | 1.0                 | 2.6   | 1.3   |       |       |            |  |  |  |  |                   |
| Alteromonadales   | Gammaproteobacteria | Proteobacteria | <i>Alteromonas</i> sp. ( <i>Alteromonas macleodii</i> )                  | 1.4            | 1.2  | 6.0   | 4.5   | 0.6   | 0.3       | 1.4   | 1.2   | 2.1   | 0.4   | 1.0       | 1.2  | 1.3   | 2.0   | 1.1   | 5.2                 | 2.0   |       |       |       |            |  |  |  |  |                   |
| Thiotrichales     | Gammaproteobacteria | Proteobacteria | <i>Methylphaga</i> sp. ( <i>Methylphaga nitratireducens</i> )            | 0.8            | 2.8  | 1.0   | 1.2   | 1.2   | 0.7       | 5.7   | 4.4   | 0.6   | 0.1   | 3.4       | 0.3  | 0.9   | 1.6   | 1.3   | 4.2                 | 2.0   |       |       |       |            |  |  |  |  |                   |
| Vibrionales       | Gammaproteobacteria | Proteobacteria | <i>Vibrio</i> sp. ( <i>Vibrio</i> sp. Ex25)                              | 0.3            | 0.2  | 1.8   | 1.3   | 1.6   | 0.9       | 0.8   | 0.7   | 1.6   | 0.9   | 0.3       | 1.1  | 1.4   | 1.7   | 1.1   | 1.8                 | 1.2   |       |       |       |            |  |  |  |  |                   |
| Alteromonadales   | Gammaproteobacteria | Proteobacteria | <i>Marinobacter</i> sp. ( <i>Marinobacter adhaerens</i> )                | 0.4            | 0.6  | 4.8   | 4.4   | 0.6   | 0.5       | 1.8   | 1.2   | 1.8   | 0.3   | 0.9       | 0.6  | 1.1   | 1.1   | 1.4   | 5.4                 | 1.8   |       |       |       |            |  |  |  |  |                   |
| Oceanospirillales | Gammaproteobacteria | Proteobacteria | <i>Thalassolituus</i> sp. ( <i>Thalassolituus oleivorans</i> )           | 0.3            | 0.3  | 2.9   | 1.9   | 0.6   | 0.6       | 1.8   | 1.2   | 2.3   | 0.5   | 1.1       | 1.2  | 1.5   | 1.0   | 1.5   | 4.3                 | 1.8   |       |       |       |            |  |  |  |  |                   |
| Thiotrichales     | Gammaproteobacteria | Proteobacteria | <i>Methylphaga</i> sp. ( <i>Methylphaga frappieri</i> )                  | 1.5            | 2.4  | 1.4   | 1.4   | 0.4   | 0.3       | 3.8   | 3.2   | 1.0   | 0.3   | 3.4       | 0.6  | 1.0   | 1.7   | 1.2   | 3.8                 | 2.0   |       |       |       |            |  |  |  |  |                   |
| Brachyspirales    | Spirochaetia        | Spirochaetes   | <i>Brachyspira</i> sp. ( <i>Brachyspira pilosicoli</i> )                 | 0.5            | 0.4  | 2.7   | 2.0   | 0.5   | 0.5       | 1.0   | 0.6   | 5.5   | 1.8   | 0.1       | 1.4  | 1.3   | 1.0   | 1.7   | 3.1                 | 1.4   |       |       |       |            |  |  |  |  |                   |
| Pseudomonadales   | Gammaproteobacteria | Proteobacteria | <i>Pseudomonas</i> sp. ( <i>Pseudomonas</i> sp. TKP)                     | 1.1            | 1.0  | 11.5  | 11.4  | 0.5   | 0.7       | 0.7   | 0.6   | 1.0   | 0.5   | 1.1       | 1.1  | 1.0   | 0.8   | 1.2   | 1.9                 | 1.2   |       |       |       |            |  |  |  |  |                   |
| Pseudomonadales   | Gammaproteobacteria | Proteobacteria | <i>Pseudomonas</i> sp. ( <i>Pseudomonas putida</i> )                     | 0.6            | 0.6  | 3.6   | 2.9   | 0.6   | 0.7       | 0.8   | 0.6   | 1.3   | 0.4   | 1.1       | 1.0  | 1.2   | 0.9   | 1.3   | 3.3                 | 1.5   |       |       |       |            |  |  |  |  |                   |
| Pseudomonadales   | Gammaproteobacteria | Proteobacteria | <i>Pseudomonas</i> sp. ( <i>Pseudomonas entomophila</i> )                | 0.6            | 0.7  | 2.1   | 2.1   | 0.7   | 0.8       | 0.7   | 0.6   | 1.1   | 0.8   | 2.7       | 0.9  | 1.0   | 0.8   | 1.1   | 1.4                 | 1.3   |       |       |       |            |  |  |  |  |                   |
| Pseudomonadales   | Gammaproteobacteria | Proteobacteria | <i>Pseudomonas</i> sp. ( <i>Pseudomonas fulva</i> )                      | 0.7            | 0.5  | 2.0   | 1.6   | 0.9   | 0.8       | 0.7   | 0.6   | 1.3   | 1.0   | 1.6       | 1.3  | 1.2   | 1.1   | 1.2   | 1.3                 | 1.3   |       |       |       |            |  |  |  |  |                   |
| Rhodobacterales   | Alphaproteobacteria | Proteobacteria | <i>Phaeobacter</i> sp. ( <i>Phaeobacter gallaeciensis</i> )              | 0.8            | 1.4  | 0.5   | 0.7   | 1.7   | 1.3       | 1.3   | 1.2   | 0.9   | 1.4   | 3.4       | 0.6  | 0.8   | 1.3   | 1.1   | 0.6                 | 1.3   |       |       |       |            |  |  |  |  |                   |
| Rhodobacterales   | Alphaproteobacteria | Proteobacteria | <i>Dinoroseobacter</i> sp. ( <i>Dinoroseobacter shibae</i> )             | 0.7            | 1.3  | 0.5   | 0.7   | 1.5   | 1.2       | 1.2   | 1.1   | 0.9   | 1.3   | 3.8       | 0.6  | 0.8   | 1.2   | 1.1   | 0.7                 | 1.4   |       |       |       |            |  |  |  |  |                   |
|                   | Alphaproteobacteria | Proteobacteria | <i>Candidatus</i> sp. ( <i>Candidatus Puniceispirillum marinum</i> )     | 0.6            | 0.5  | 0.8   | 0.8   | 1.0   | 1.0       | 0.7   | 0.6   | 1.5   | 2.2   | 0.2       | 1.1  | 1.0   | 1.0   | 1.1   | 0.7                 | 0.8   |       |       |       |            |  |  |  |  |                   |
|                   | Alphaproteobacteria | Proteobacteria | <i>alpha</i> sp. ( <i>alpha</i> proteobacterium HIMB5)                   | 0.8            | 0.7  | 1.3   | 0.9   | 0.8   | 0.2       | 2.2   | 0.4   | 0.9   | 0.4   | 0.1       | 1.2  | 1.4   | 3.6   | 6.3   | 2.1                 | 2.5   |       |       |       |            |  |  |  |  |                   |
| Burkholderiales   | Betaproteobacteria  | Proteobacteria | <i>Palaromonas</i> sp. ( <i>Palaromonas</i> sp. JS666)                   | 0.9            | 1.0  | 1.6   | 1.2   | 0.9   | 0.9       | 0.9   | 0.7   | 1.4   | 0.6   | 1.1       | 0.9  | 1.4   | 1.0   | 1.4   | 2.3                 | 1.3   |       |       |       |            |  |  |  |  |                   |
| Myxococcales      | Deltaproteobacteria | Proteobacteria | <i>Myxococcus</i> sp. ( <i>Myxococcus fulvus</i> )                       | 1.2            | 1.5  | 1.2   | 1.3   | 0.8   | 0.9       | 1.0   | 0.7   | 0.8   | 1.0   | 1.0       | 1.8  | 0.9   | 0.9   | 1.5   | 1.2                 | 1.0   |       |       |       |            |  |  |  |  |                   |
| Planctomycetales  | Planctomycetia      | Planctomycetes | <i>Planctomyces</i> sp. ( <i>Planctomyces limnophilus</i> )              | 0.6            | 1.2  | 1.1   | 1.4   | 0.6   | 1.2       | 0.6   | 0.6   | 1.7   | 0.8   | 1.4       | 0.5  | 0.8   | 0.5   | 1.0   | 2.0                 | 1.0   |       |       |       |            |  |  |  |  |                   |
| Pasteurellales    | Gammaproteobacteria | Proteobacteria | <i>Actinobacillus</i> sp. ( <i>Actinobacillus succinogenes</i> )         | 1.4            | 2.1  | 0.5   | 0.5   | 0.3   | 0.4       | 2.5   | 1.3   | 0.5   | 0.5   | 1.6       | 1.7  | 1.0   | 0.7   | 1.8   | 1.0                 | 1.1   |       |       |       |            |  |  |  |  |                   |
| Aquificales       | Aquificae           | Aquificae      | <i>Sulfurihydrogenibium</i> sp. ( <i>Sulfurihydrogenibium azorense</i> ) | 1.9            | 1.9  | 0.0   | 0.0   | 0.4   | 0.2       | 1.8   | 1.5   | 0.3   | 2.7   | 4.0       | 1.0  | 1.0   | 2.0   | 1.2   | 0.1                 | 1.5   |       |       |       |            |  |  |  |  |                   |
| Sphingomonadales  | Alphaproteobacteria | Proteobacteria | <i>Novosphingobium</i> sp. ( <i>Novosphingobium aromaticivorans</i> )    | 2.3            | 2.7  | 0.6   | 0.7   | 0.3   | 0.3       | 0.5   | 0.7   | 0.4   | 0.7   | 2.0       | 0.9  | 0.9   | 0.8   | 0.8   | 0.7                 | 1.0   |       |       |       |            |  |  |  |  |                   |
| Sphingomonadales  | Alphaproteobacteria | Proteobacteria | <i>Sphingobium</i> sp. ( <i>Sphingobium japonicum</i> )                  | 1.7            | 2.2  | 0.5   | 0.6   | 0.4   | 0.5       | 0.5   | 0.6   | 0.6   | 0.9   | 2.1       | 0.8  | 0.8   | 0.8   | 0.7   | 1.0                 | 1.0   |       |       |       |            |  |  |  |  |                   |
| Burkholderiales   | Betaproteobacteria  | Proteobacteria | <i>Variovorax</i> sp. ( <i>Variovorax paradoxus</i> )                    | 1.1            | 1.1  | 2.0   | 1.8   | 1.0   | 1.1       | 1.1   | 1.0   | 1.5   | 0.7   | 1.7       | 1.0  | 1.1   | 0.9   | 1.1   | 2.0                 | 1.3   |       |       |       |            |  |  |  |  |                   |
| Burkholderiales   | Betaproteobacteria  | Proteobacteria | <i>Janthinobacterium</i> sp. ( <i>Janthinobacterium</i> sp. Marseille)   | 0.8            | 0.6  | 2.6   | 2.0   | 0.5   | 0.4       | 0.7   | 0.6   | 1.2   | 0.6   | 0.8       | 1.3  | 1.3   | 1.1   | 1.2   | 1.9                 | 1.3   |       |       |       |            |  |  |  |  |                   |
| Alteromonadales   | Gammaproteobacteria | Proteobacteria | <i>Marinobacter</i> sp. ( <i>Marinobacter hydrocarbonoclasticus</i> )    | 0.3            | 0.4  | 3.9   | 3.1   | 0.5   | 0.5       | 1.4   | 1.1   | 1.4   | 0.4   | 1.4       | 0.9  | 1.3   | 1.0   | 1.3   | 3.5                 | 1.6   |       |       |       |            |  |  |  |  |                   |
| Enterobacteriales | Gammaproteobacteria | Proteobacteria | <i>Rahnella</i> sp. ( <i>Rahnella aquatilis</i> )                        | 0.8            | 0.6  | 1.8   | 1.6   | 1.5   | 0.8       | 0.5   | 0.3   | 1.2   | 1.0   | 1.2       | 1.3  | 1.1   | 1.8   | 1.5   | 1.3                 | 1.4   |       |       |       |            |  |  |  |  |                   |
| Enterobacteriales | Gammaproteobacteria | Proteobacteria | <i>Serratia</i> sp. ( <i>Serratia marcescens</i> )                       | 0.6            | 0.6  | 1.8   | 1.6   | 0.9   | 0.9       | 1.1   | 0.9   | 1.0   | 0.6   | 0.8       | 0.9  | 1.1   | 1.0   | 1.2   | 1.7                 | 1.1   |       |       |       |            |  |  |  |  |                   |
| Enterobacteriales | Gammaproteobacteria | Proteobacteria | <i>Yersinia</i> sp. ( <i>Yersinia pseudotuberculosis</i> )               | 0.4            | 0.3  | 0.2   | 0.1   | 0.6   | 0.6       | 0.1   | 0.2   | 2.7   | 1.5   | 0.7       | 1.2  | 1.8   | 0.9   | 0.7   | 1.8                 | 1.2   |       |       |       |            |  |  |  |  |                   |
| Rhizobiales       | Alphaproteobacteria | Proteobacteria | <i>Methylobacterium</i> sp. ( <i>Methylobacterium nodulans</i> )         | 0.8            | 1.2  | 0.7   | 0.8   | 1.0   | 0.9       | 1.5   | 1.3   | 0.8   | 0.8   | 1.7       | 0.6  | 0.9   | 1.0   | 1.2   | 1.0                 | 1.1   |       |       |       |            |  |  |  |  |                   |
| Rhizobiales       | Alphaproteobacteria | Proteobacteria | <i>Rhodopseudomonas</i> sp. ( <i>Rhodopseudomonas palustris</i> )        | 1.2            | 1.2  | 0.9   | 1.0   | 0.8   | 0.8       | 1.3   | 1.3   | 1.0   | 0.8   | 2.4       | 1.0  | 1.0   | 1.0   | 1.0   | 1.2                 | 1.3   |       |       |       |            |  |  |  |  |                   |
| Rhizobiales       | Alphaproteobacteria | Proteobacteria | <i>Sinorhizobium</i> sp. ( <i>Sinorhizobium medicae</i> )                | 0.5            | 0.6  | 0.8   | 0.7   | 1.2   | 1.2       | 1.5   | 1.4   | 0.9   | 1.1   | 2.2       | 0.8  | 1.1   | 1.0   | 1.0   | 0.8                 | 1.2   |       |       |       |            |  |  |  |  |                   |
| Rhodobacterales   | Alphaproteobacteria | Proteobacteria | <i>Roseobacter</i> sp. ( <i>Roseobacter denitrificans</i> )              | 0.7            | 1.0  | 0.4   | 0.6   | 1.4   | 1.3       | 1.3   | 1.2   | 0.9   | 1.5   | 2.8       | 0.7  | 0.8   | 1.0   | 1.1   | 0.6                 | 1.2   |       |       |       |            |  |  |  |  |                   |
| Rhodobacterales   | Alphaproteobacteria | Proteobacteria | <i>Roseobacter</i> sp. ( <i>Roseobacter litoralis</i> )                  | 0.7            | 1.2  | 0.6   | 0.7   | 1.4   | 1.4       | 1.1   | 1.2   | 0.7   | 1.2   | 1.9       | 0.6  | 0.8   | 1.0   | 1.0   | 0.6                 | 1.0   |       |       |       |            |  |  |  |  |                   |
| Rhodobacterales   | Alphaproteobacteria | Proteobacteria | <i>Rhodobacter</i> sp. ( <i>Rhodobacter sphaeroides</i> )                | 0.7            | 1.1  | 0.5   | 0.6   | 1.5   | 1.4       | 1.2   | 1.1   | 0.8   | 1.2   | 3.6       | 0.6  | 0.8   | 1.1   | 1.1   | 0.7                 | 1.3   |       |       |       |            |  |  |  |  |                   |
| Rhodobacterales   | Alphaproteobacteria | Proteobacteria | <i>Paracoccus</i> sp. ( <i>Paracoccus denitrificans</i> )                | 0.7            | 1.1  | 0.6   | 0.7   | 1.3   | 1.3       | 1.2   | 1.2   | 0.8   | 1.1   | 3.8       | 0.6  | 0.8   | 1.0   | 1.0   | 0.7                 | 1.3   |       |       |       |            |  |  |  |  |                   |
| Rhodobacterales   | Alphaproteobacteria | Proteobacteria | <i>Jannaschia</i> sp. ( <i>Jannaschia</i> sp. CCS1)                      | 0.6            | 1.0  | 0.6   | 0.7   | 1.2   | 1.1       | 1.1   | 1.1   | 0.9   | 1.4   | 2.7       | 0.6  | 0.8   | 1.1   | 1.0   | 0.6                 | 1.1   |       |       |       |            |  |  |  |  |                   |
| Rhodobacterales   | Alphaproteobacteria | Proteobacteria | <i>Rhodobacter</i> sp. ( <i>Rhodobacter capsulatus</i> )                 | 0.7            | 1.1  | 0.4   | 0.6   | 1.3   | 1.2       | 1.2   | 1.1   | 0.9   | 1.2   | 3.2       | 0.7  | 0.8   | 1.1   | 1.1   | 0.7                 | 1.2   |       |       |       |            |  |  |  |  |                   |
| Rhodobacterales   | Alphaproteobacteria | Proteobacteria | <i>Ketogulonicigenium</i> sp. ( <i>Ketogulonicigenium vulgare</i> )      | 0.7            | 1.0  | 0.5   | 0.7   | 1.2   | 1.1       | 1.1   | 1.1   | 0.7   | 1.0   | 2.3       | 0.7  | 0.8   | 1.1   | 1.0   | 0.7                 | 1.1   |       |       |       |            |  |  |  |  |                   |
| Rhodobacterales   | Alphaproteobacteria | Proteobacteria | <i>Paracoccus</i> sp. ( <i>Paracoccus aminophilus</i> )                  | 0.7            | 1.1  | 0.5   | 0.6   | 1.2   | 1.1       | 1.0   | 1.0   | 0.7   | 1.2   | 2.4       | 0.6  | 0.8   | 1.0   | 0.9   | 0.6                 | 1.1   |       |       |       |            |  |  |  |  |                   |
| Rhodobacterales   | Alphaproteobacteria | Proteobacteria | <i>Octadecabacter</i> sp. ( <i>Octadecabacter antarcticus</i> )          | 0.7            | 1.2  | 0.4   | 0.6   | 0.9   | 0.9       | 1.0   | 0.7   | 1.3   | 1.4   | 0.6       | 0.8  | 1.0   | 0.9   | 0.6   | 0.9                 |       |       |       |       |            |  |  |  |  |                   |
| Rhodobacterales   | Alphaproteobacteria | Proteobacteria | <i>Octadecabacter</i> sp. ( <i>Octadecabacter arcticus</i> )             | 0.7            | 1.0  | 0.5   | 0.7   | 0.9   | 1.0       | 0.9   | 1.0   | 0.7   | 1.3   | 1.4       | 0.7  | 0.8   | 0.9   | 0.9   | 0.5                 | 0.9   |       |       |       |            |  |  |  |  |                   |
| Enterobacteriales | Gammaproteobacteria | Proteobacteria | <i>Erwinia</i> sp. ( <i>Erwinia amylovora</i> )                          | 1.1            | 1.1  | 1.4   | 1.4   | 0.5   | 0.4       | 1.7   | 1.0   | 1.0   | 0.5   | 1.3       | 1.0  | 1.0   | 1.3   | 1.6   | 2.1                 | 1.4   |       |       |       |            |  |  |  |  |                   |
| Chlamydiales      | Chlamydia           | Chlamydiae</   |                                                                          |                |      |       |       |       |           |       |       |       |       |           |      |       |       |       |                     |       |       |       |       |            |  |  |  |  |                   |



C

| Order               | Class                                       | Phylum              | Species                                                                                       | Species abundance |      |       |       |       |       |       |                     |       |       |      |      |       |       |       |       |     |  |
|---------------------|---------------------------------------------|---------------------|-----------------------------------------------------------------------------------------------|-------------------|------|-------|-------|-------|-------|-------|---------------------|-------|-------|------|------|-------|-------|-------|-------|-----|--|
|                     |                                             |                     |                                                                                               | Aerosolization    |      |       |       |       |       |       | Surface Enhancement |       |       |      |      |       |       |       |       |     |  |
|                     |                                             |                     |                                                                                               |                   |      |       |       |       |       |       |                     |       |       |      |      |       |       |       |       |     |  |
|                     |                                             |                     |                                                                                               | 8A:B              | 8A:5 | 19A:B | 19A:5 | 24A:B | 24A:5 | 28A:B | 28A:5               | 34A:B | 34A:5 | 05:B | 85:B | 195:B | 245:B | 285:B | 345:B | AVG |  |
| Sphingomonadales    | Alphaproteobacteria                         | Proteobacteria      | <i>Zymomonas</i> sp. ( <i>Zymomonas mobilis</i> )                                             | 0.6               | 0.7  | 0.6   | 0.6   | 0.2   | 0.3   | 0.6   | 0.6                 | 0.8   | 0.8   | 0.9  | 1.0  | 0.8   | 1.0   | 0.8   | 0.9   |     |  |
| Sphingomonadales    | Alphaproteobacteria                         | Proteobacteria      | <i>Erythrobacter</i> sp. ( <i>Erythrobacter litoralis</i> )                                   | 0.6               | 0.8  | 0.4   | 0.5   | 0.2   | 0.2   | 0.5   | 0.6                 | 0.4   | 0.7   | 1.8  | 0.7  | 0.8   | 0.7   | 0.8   | 0.6   | 0.9 |  |
| Cytophagales        | Cytophagia                                  | Bacteroidetes       | <i>Cytophaga</i> sp. ( <i>Cytophaga hutchinsonii</i> )                                        | 0.4               | 0.2  | 0.5   | 0.4   | 0.4   | 0.6   | 0.5   | 1.0                 | 4.5   | 2.8   | 0.3  | 2.1  | 1.1   | 0.7   | 0.5   | 1.6   | 1.0 |  |
| Cytophagales        | Cytophagia                                  | Bacteroidetes       | <i>Cyclobacterium</i> sp. ( <i>Cyclobacterium marinum</i> )                                   | 0.2               | 0.3  | 0.1   | 0.1   | 0.6   | 0.8   | 2.1   | 2.2                 | 0.4   | 0.5   | 2.4  | 0.7  | 1.0   | 0.8   | 0.9   | 0.7   | 1.1 |  |
| Flavobacteriales    | Flavobacteriia                              | Bacteroidetes       | <i>Capnocytophaga</i> sp. ( <i>Capnocytophaga ochracea</i> )                                  | 0.2               | 0.3  | 0.4   | 0.4   | 0.1   | 0.1   | 1.2   | 1.7                 | 0.6   | 1.8   | 1.5  | 0.8  | 0.9   | 0.7   | 0.7   | 0.4   | 0.8 |  |
| Natrialbales        | Halobacteria                                | Euryarchaeota       | <i>Halovivax</i> sp. ( <i>Halovivax ruber</i> )                                               | 1.1               | 0.7  | 1.6   | 0.6   | 0.4   | 0.2   | 0.4   | 0.2                 | 1.9   | 0.5   | 0.4  | 1.7  | 2.7   | 2.3   | 2.4   | 3.8   | 2.2 |  |
| Flavobacteriales    | Flavobacteriia                              | Bacteroidetes       | <i>Zobellia</i> sp. ( <i>Zobellia galactinarum</i> )                                          | 0.2               | 0.3  | 0.1   | 0.1   | 0.5   | 0.4   | 1.3   | 2.0                 | 0.6   | 1.0   | 2.5  | 0.9  | 1.0   | 1.2   | 0.7   | 0.6   | 1.1 |  |
| Flavobacteriales    | Flavobacteriia                              | Bacteroidetes       | <i>Blattabacterium</i> sp. ( <i>Mastotermes darwiniensis</i> )                                | 1.0               | 2.3  | 0.4   | 0.5   | 0.4   | 0.4   | 0.2   | 0.4                 | 0.1   | 0.4   | 0.8  | 0.4  | 0.9   | 0.9   | 0.7   | 0.3   | 0.7 |  |
| Flavobacteriales    | Flavobacteriia                              | Bacteroidetes       | <i>Ornithobacterium</i> sp. ( <i>Ornithobacterium rhinotracheale</i> )                        | 0.3               | 0.4  | 0.1   | 0.1   | 0.4   | 0.4   | 1.4   | 1.6                 | 0.3   | 1.1   | 1.8  | 0.9  | 1.1   | 1.1   | 0.9   | 0.3   | 1.0 |  |
| Flavobacteriales    | Flavobacteriia                              | Bacteroidetes       | <i>Polaribacter</i> sp. ( <i>Polaribacter</i> sp. MED152)                                     | 0.3               | 0.3  | 0.1   | 0.1   | 0.2   | 0.2   | 0.8   | 1.3                 | 0.2   | 2.3   | 3.1  | 0.9  | 1.0   | 1.0   | 0.6   | 0.1   | 1.1 |  |
| Flavobacteriales    | Flavobacteriia                              | Bacteroidetes       | <i>Lacinutrix</i> sp. ( <i>Lacinutrix</i> sp. 5H-3-7-4)                                       | 0.3               | 0.3  | 0.2   | 0.2   | 0.4   | 0.3   | 1.0   | 1.6                 | 0.3   | 1.1   | 2.4  | 0.7  | 0.9   | 1.0   | 0.7   | 0.2   | 1.0 |  |
| Flavobacteriales    | Flavobacteriia                              | Bacteroidetes       | <i>Nonlabens</i> sp. ( <i>Nonlabens dokdonensis</i> )                                         | 0.1               | 0.2  | 0.3   | 0.3   | 0.4   | 0.3   | 1.0   | 1.5                 | 0.2   | 0.7   | 1.9  | 0.8  | 1.0   | 1.1   | 0.7   | 0.4   | 1.0 |  |
| Sphingobacteriales  | Sphingobacteriia                            | Bacteroidetes       | <i>Pedobacter</i> sp. ( <i>Pedobacter saltans</i> )                                           | 0.4               | 0.2  | 0.2   | 0.2   | 0.2   | 0.2   | 1.5   | 2.3                 | 0.3   | 0.8   | 2.6  | 1.7  | 1.0   | 0.8   | 0.6   | 0.4   | 1.2 |  |
| Chlamydiales        | Chlamydia                                   | Chlamydiae          | <i>Waddlia</i> sp. ( <i>Waddlia chondrophila</i> )                                            | 0.9               | 0.8  | 0.2   | 0.1   | 0.2   | 0.1   | 1.5   | 1.2                 | 0.7   | 2.2   | 5.7  | 1.2  | 1.8   | 1.5   | 1.2   | 0.3   | 0.9 |  |
| Thermales           | Deinococci                                  | Deinococcus-Thermus | <i>Meiothermus</i> sp. ( <i>Meiothermus silvanus</i> )                                        | 0.3               | 0.3  | 0.6   | 0.6   | 0.2   | 0.2   | 1.6   | 0.8                 | 0.2   | 0.1   | 3.2  | 1.1  | 1.0   | 1.2   | 1.9   | 2.3   | 1.8 |  |
| Acidothermales      | Actinobacteria                              | Actinobacteria      | <i>Acidothermus</i> sp. ( <i>Acidothermus cellulolyticus</i> )                                | 0.4               | 0.3  | 0.9   | 0.8   | 0.5   | 0.4   | 0.3   | 0.4                 | 0.3   | 0.3   | 0.8  | 1.5  | 1.2   | 1.1   | 0.8   | 1.1   | 1.1 |  |
| Corynebacteriales   | Actinobacteria                              | Actinobacteria      | <i>Corynebacterium</i> sp. ( <i>Corynebacterium kropschtedtii</i> )                           | 0.8               | 0.5  | 0.3   | 0.2   | 0.2   | 0.3   | 0.6   | 0.7                 | 0.4   | 0.2   | 1.5  | 1.6  | 1.2   | 0.6   | 0.9   | 2.4   | 1.4 |  |
|                     | Gammaproteobacteria                         | Proteobacteria      | <i>Simidiua</i> sp. ( <i>Simidiua agarivorans</i> )                                           | 0.3               | 0.3  | 1.2   | 0.9   | 0.5   | 0.5   | 1.0   | 0.8                 | 1.2   | 0.8   | 1.8  | 1.3  | 1.4   | 1.0   | 1.3   | 1.4   | 1.4 |  |
|                     | Epsilonproteobacteria                       | Proteobacteria      | <i>Sulfurovum</i> sp. ( <i>Sulfurovum</i> sp. NBC37-1)                                        | 0.5               | 0.3  | 0.1   | 0.1   | 0.1   | 0.1   | 0.9   | 1.6                 | 0.2   | 0.7   | 1.3  | 1.4  | 1.0   | 0.6   | 0.5   | 0.4   | 0.9 |  |
| Magnetococcales     | Alphaproteobacteria                         | Proteobacteria      | <i>Magnetococcus</i> sp. ( <i>Magnetococcus marinum</i> )                                     | 0.2               | 0.1  | 0.5   | 0.5   | 0.4   | 0.4   | 0.8   | 0.7                 | 0.6   | 0.6   | 2.6  | 1.2  | 1.1   | 0.9   | 1.3   | 1.0   | 1.4 |  |
|                     | Alphaproteobacteria                         | Proteobacteria      | <i>Polymorphum</i> sp. ( <i>Polymorphum gilvum</i> )                                          | 0.6               | 0.7  | 0.6   | 0.7   | 1.2   | 1.2   | 1.4   | 1.4                 | 0.8   | 0.8   | 3.3  | 0.8  | 0.9   | 0.9   | 1.1   | 0.9   | 1.3 |  |
|                     | Alphaproteobacteria                         | Proteobacteria      | <i>alpha</i> sp. ( <i>alpha</i> proteobacterium HIMB59)                                       | 0.4               | 0.3  | 0.2   | 0.2   | 0.4   | 0.3   | 0.4   | 0.2                 | 0.5   | 0.8   | 0.1  | 1.4  | 1.3   | 1.1   | 2.1   | 0.7   | 1.1 |  |
| Nitrosomonadales    | Betaproteobacteria                          | Proteobacteria      | <i>Nitrosospira</i> sp. ( <i>Nitrosospira multiformis</i> )                                   | 0.2               | 0.2  | 0.9   | 0.9   | 0.6   | 0.7   | 0.8   | 0.7                 | 0.1   | 0.1   | 3.3  | 1.2  | 1.0   | 0.8   | 1.1   | 1.7   | 1.5 |  |
| Desulfuovibrionales | Delta proteobacteria                        | Proteobacteria      | <i>Desulfuohalobium</i> sp. ( <i>Desulfuohalobium rethaense</i> )                             | 0.6               | 0.4  | 0.6   | 0.7   | 0.5   | 0.5   | 0.6   | 0.6                 | 0.5   | 0.5   | 1.8  | 1.6  | 0.9   | 1.0   | 1.1   | 1.0   | 1.2 |  |
| Desulfuomonadales   | Delta proteobacteria                        | Proteobacteria      | <i>Geobacter</i> sp. ( <i>Geobacter sulfurreducens</i> )                                      | 0.2               | 0.2  | 1.1   | 1.1   | 0.5   | 0.5   | 0.9   | 0.7                 | 0.9   | 0.5   | 2.3  | 1.0  | 0.9   | 1.0   | 1.4   | 1.8   | 1.4 |  |
| Desulfuomonadales   | Delta proteobacteria                        | Proteobacteria      | <i>Geobacter</i> sp. ( <i>Geobacter lovleyi</i> )                                             | 0.7               | 1.2  | 0.6   | 0.6   | 0.2   | 0.2   | 0.6   | 0.3                 | 0.3   | 0.3   | 1.1  | 0.6  | 1.0   | 0.8   | 2.1   | 0.8   | 1.1 |  |
|                     | Geobacter sp. ( <i>Geobacter daltonii</i> ) | Proteobacteria      | <i>Geobacter</i> sp. ( <i>Geobacter daltonii</i> )                                            | 0.2               | 0.2  | 0.3   | 0.4   | 0.2   | 0.4   | 0.6   | 0.6                 | 0.5   | 0.8   | 1.0  | 0.8  | 0.8   | 0.5   | 1.0   | 0.7   | 0.8 |  |
| Campylobacteriales  | Epsilonproteobacteria                       | Proteobacteria      | <i>Nitratifactor</i> sp. ( <i>Nitratifactor salsuginis</i> )                                  | 0.2               | 0.2  | 0.9   | 0.9   | 0.6   | 0.5   | 0.2   | 0.2                 | 0.4   | 0.7   | 0.5  | 1.3  | 1.0   | 1.2   | 1.0   | 0.7   | 0.9 |  |
| Campylobacteriales  | Epsilonproteobacteria                       | Proteobacteria      | <i>Arcobacter</i> sp. ( <i>Arcobacter nitrofigilis</i> )                                      | 0.6               | 0.6  | 0.3   | 0.2   | 0.4   | 0.3   | 0.3   | 0.3                 | 0.5   | 0.7   | 0.3  | 1.1  | 1.2   | 1.2   | 0.8   | 0.7   | 0.9 |  |
| Alteromonadales     | Gammaproteobacteria                         | Proteobacteria      | <i>Shewanella</i> sp. ( <i>Shewanella</i> sp. MR-7)                                           | 0.2               | 0.1  | 1.4   | 0.7   | 0.4   | 0.3   | 1.2   | 0.6                 | 1.3   | 0.6   | 1.1  | 1.4  | 2.0   | 2.1   | 2.0   | 2.1   | 1.6 |  |
| Alteromonadales     | Gammaproteobacteria                         | Proteobacteria      | <i>Psychromonas</i> sp. ( <i>Psychromonas</i> sp. CNPT3)                                      | 0.6               | 0.6  | 0.7   | 0.4   | 0.5   | 0.4   | 0.6   | 0.5                 | 0.6   | 0.4   | 0.5  | 0.9  | 1.7   | 1.3   | 1.1   | 1.4   | 1.2 |  |
| Alteromonadales     | Gammaproteobacteria                         | Proteobacteria      | <i>Idiomarina</i> sp. ( <i>Idiomarina loihiensis</i> )                                        | 0.6               | 0.6  | 0.6   | 0.4   | 0.3   | 0.2   | 0.8   | 0.5                 | 0.7   | 0.5   | 1.0  | 1.1  | 1.6   | 1.7   | 1.4   | 1.3   | 1.4 |  |
| Enterobacteriales   | Gammaproteobacteria                         | Proteobacteria      | <i>Edwardsiella</i> sp. ( <i>Edwardsiella ictulani</i> )                                      | 0.4               | 0.3  | 1.1   | 0.9   | 0.4   | 0.3   | 0.5   | 0.4                 | 0.7   | 0.3   | 0.5  | 1.2  | 1.3   | 1.2   | 1.2   | 2.0   | 1.2 |  |
| Legionellales       | Gammaproteobacteria                         | Proteobacteria      | <i>Coxiella</i> sp. ( <i>Coxiella burnetii</i> )                                              | 0.6               | 0.6  | 1.0   | 0.6   | 0.2   | 0.4   | 0.6   | 0.8                 | 0.4   | 0.4   | 1.1  | 1.0  | 1.6   | 0.5   | 0.8   | 1.0   | 1.0 |  |
| Pasteurellales      | Gammaproteobacteria                         | Proteobacteria      | <i>Haemophilus</i> sp. ( <i>Haemophilus parasuis</i> )                                        | 0.7               | 0.6  | 0.3   | 0.3   | 0.5   | 0.3   | 0.6   | 0.5                 | 1.2   | 0.6   | 0.8  | 1.0  | 1.1   | 1.7   | 1.3   | 1.8   | 1.3 |  |
| Pseudomonadales     | Gammaproteobacteria                         | Proteobacteria      | <i>Moraxella</i> sp. ( <i>Moraxella catarrhalis</i> )                                         | 0.4               | 0.3  | 0.2   | 0.1   | 0.4   | 0.3   | 1.0   | 0.7                 | 0.5   | 0.3   | 0.6  | 1.3  | 1.3   | 1.3   | 1.5   | 1.4   | 1.2 |  |
| Thiotrichales       | Gammaproteobacteria                         | Proteobacteria      | <i>Francisella</i> sp. ( <i>Francisella</i> sp. TX077308)                                     | 0.5               | 0.6  | 0.6   | 0.5   | 0.5   | 0.5   | 0.7   | 0.9                 | 0.4   | 0.2   | 0.7  | 0.8  | 1.4   | 1.0   | 1.8   | 2.3   | 1.2 |  |
| Burkholderiales     | Betaproteobacteria                          | Proteobacteria      | <i>Ralstonia</i> sp. ( <i>Ralstonia pickettii</i> )                                           | 0.9               | 0.9  | 1.5   | 1.4   | 0.8   | 0.9   | 0.9   | 0.7                 | 1.1   | 0.9   | 1.7  | 1.0  | 1.1   | 0.9   | 1.3   | 1.2   | 1.2 |  |
| Burkholderiales     | Betaproteobacteria                          | Proteobacteria      | <i>Taylorella</i> sp. ( <i>Taylorella asinigenitalis</i> )                                    | 0.1               | 0.1  | 1.1   | 1.0   | 0.1   | 0.1   | 0.5   | 0.5                 | 0.7   | 1.2   | 0.8  | 1.1  | 1.2   | 0.9   | 1.2   | 0.6   | 1.0 |  |
| Burkholderiales     | Betaproteobacteria                          | Proteobacteria      | <i>Taylorella</i> sp. ( <i>Taylorella equigenitalis</i> )                                     | 0.3               | 0.2  | 0.2   | 0.1   | 0.3   | 0.6   | 0.8   | 0.6                 | 0.1   | 0.2   | 0.8  | 1.7  | 1.3   | 0.4   | 1.3   | 0.8   | 1.1 |  |
| Bacteroidales       | Bacteroidia                                 | Bacteroidetes       | <i>Bacteroides</i> sp. ( <i>Bacteroides vulgatus</i> )                                        | 0.6               | 0.8  | 0.8   | 0.7   | 0.5   | 0.7   | 0.6   | 0.8                 | 0.3   | 0.1   | 1.5  | 0.7  | 1.1   | 0.8   | 0.7   | 2.2   | 1.2 |  |
|                     | Bacteroidia                                 | Bacteroidetes       | <i>Candidatus Azobacteroides</i> sp. ( <i>Candidatus Azobacteroides pseudotrichonymphae</i> ) | 0.8               | 0.3  | 0.6   | 0.5   | 0.4   | 0.4   | 0.4   | 0.5                 | 0.7   | 0.6   | 1.0  | 2.5  | 1.1   | 0.8   | 0.7   | 1.1   | 1.2 |  |
|                     | Bacteroidia                                 | Bacteroidetes       | <i>Bacteroides</i> sp. ( <i>Bacteroides fragilis</i> )                                        | 0.4               | 0.3  | 0.6   | 0.5   | 0.6   | 0.4   | 0.7   | 0.4                 | 0.5   | 0.9   | 1.4  | 1.5  | 1.2   | 1.6   | 1.6   | 0.6   | 1.3 |  |
|                     | Bacteroidia                                 | Bacteroidetes       | <i>Paludibacter</i> sp. ( <i>Paludibacter propionigenens</i> )                                | 0.4               | 0.7  | 0.1   | 0.1   | 0.5   | 0.6   | 0.7   | 1.0                 | 0.2   | 0.3   | 0.9  | 0.7  | 0.9   | 0.9   | 0.7   | 0.8   | 0.8 |  |
| Flavobacteriales    | Flavobacteriia                              | Bacteroidetes       | <i>Croceibacter</i> sp. ( <i>Croceibacter atlanticus</i> )                                    | 0.3               | 0.4  | 0.2   | 0.2   | 0.4   | 0.4   | 0.7   | 1.2                 | 0.3   | 1.5   | 1.6  | 0.7  | 1.0   | 0.9   | 0.6   | 0.2   | 0.8 |  |
| Flavobacteriales    | Flavobacteriia                              | Bacteroidetes       | <i>Fluviicola</i> sp. ( <i>Fluviicola taffensis</i> )                                         | 0.4               | 0.4  | 0.5   | 0.5   | 0.3   | 0.4   | 1.0   | 1.2                 | 0.2   | 0.5   | 1.3  | 1.0  | 1.0   | 0.9   | 0.8   | 0.4   | 0.9 |  |
| Flavobacteriales    | Flavobacteriia                              | Bacteroidetes       | <i>Blattabacterium</i> sp. ( <i>Blattabacterium punctulatus</i> )                             | 0.5               | 0.3  | 0.5   | 0.6   | 0.1   | 0.3   | 0.9   | 1.5                 | 0.2   | 0.3   | 1.2  | 1.5  | 0.9   | 0.6   | 0.6   | 0.9   | 1.0 |  |
| Flavobacteriales    | Flavobacteriia                              | Bacteroidetes       | <i>Dakdonia</i> sp. ( <i>Dakdonia</i> sp. 4H-3-7-5)                                           | 0.3               | 0.3  | 0.1   | 0.2   | 0.4   | 0.4   | 0.8   | 1.0                 | 0.3   | 1.1   | 2.1  | 0.8  | 0.9   | 1.1   | 0.7   | 0.3   | 1.0 |  |
| Flavobacteriales    | Flavobacteriia                              | Bacteroidetes       | <i>Maribacter</i> sp. ( <i>Maribacter</i> sp. HTCC2170)                                       | 0.2               | 0.2  | 0.1   | 0.1   | 0.4   | 0.3   | 0.9   | 1.3                 | 0.3   | 0.9   | 2.3  | 0.8  | 0.9   | 1.2   | 0.6   | 0.3   | 1.0 |  |
| Flavobacteriales    | Flavobacteriia                              | Bacteroidetes       | <i>Cellulophaga</i> sp. ( <i>Cellulophaga algicola</i> )                                      | 0.2               | 0.3  | 0.2   | 0.2   | 0.3   | 0.3   | 0.8   | 1.1                 | 0.3   | 1.2   | 1.8  | 0.9  | 1.1   | 1.0   | 0.7   | 0.2   | 1.0 |  |
| Flavobacteriales    | Flavobacteriia                              | Bacteroidetes       | <i>Flavobacterium</i> sp. ( <i>Flavobacterium indicum</i> )                                   | 0.2               | 0.3  | 0.2   | 0.2   | 0.2   | 0.2   | 0.9   | 1.2                 | 0.2   | 1.2   | 2.3  | 0.7  | 1.0   | 0.9   | 0.7   | 0.2   | 1.0 |  |
| Flavobacteriales    | Flavobacteriia                              | Bacteroidetes       | <i>Blattabacterium</i> sp. ( <i>Blattella germanica</i> )                                     | 0.1               | 0.3  | 0.2   | 0.2   | 0.5   | 0.5   | 0.6   | 1.0                 | 0.5   | 0.9   | 2.8  | 0.5  | 0.9   | 0.9   | 0.6   | 0.6   | 1.0 |  |
| Flavobacteriales    | Flavobacteriia                              | Bacteroidetes       | <i>Owenweeksia</i> sp. ( <i>Owenweeksia hongkongensis</i> )                                   | 0.2               | 0.2  | 0.2   | 0.2   | 0.3   | 0.3   | 0.7   | 1.0                 | 0.4   | 1.3   | 1.8  | 0.8  | 0.9   | 0.9   | 0.7   | 0.3   | 0.9 |  |
| Flavobacteriales    | Flavobacteriia                              | Bacteroidetes       | <i>Aequorivita</i> sp. ( <i>Aequorivita sublithincola</i> )                                   | 0.1               | 0.2  | 0.3   | 0.3   | 0.4   | 0.3   | 0.8   | 1.2                 | 0.4   | 0.8   | 1.5  | 0.7  | 1.0   | 1.1   | 0.7   | 0.5   | 0.9 |  |
| Flavobacteriales    | Flavobacteriia                              | Bacteroidetes       | <i>Zunongwangia</i> sp. ( <i>Zunongwangia profunda</i> )                                      | 0.2               | 0.3  | 0.3   | 0.3   | 0.3   | 0.3   | 0.9   | 1.1                 | 0.3   | 0.6   | 2.5  | 0.7  | 0.9   | 1.0   | 0.8   | 0.4   | 1.0 |  |
| Flavobacteriales    | Flavobacteriia                              | Bacteroidetes       | <i>Capnocytophaga</i> sp. ( <i>Capnocytophaga canimorsus</i> )                                | 0.1               | 0.2  | 0.2   | 0.2   | 0.4   | 0.3   | 1.0   | 1.4                 | 0.3   | 0.7   | 2.1  | 0.7  | 0.9   | 1.2   | 0.7   | 0.5   | 1.0 |  |
| Flavobacteriales    | Flavobacteriia                              | Bacteroidetes       | <i>Cellulophaga</i> sp. ( <i>Cellulophaga lytica</i> )                                        | 0.3               | 0.4  | 0.2   | 0.2   | 0.3   | 0.3   | 0.8   |                     |       |       |      |      |       |       |       |       |     |  |

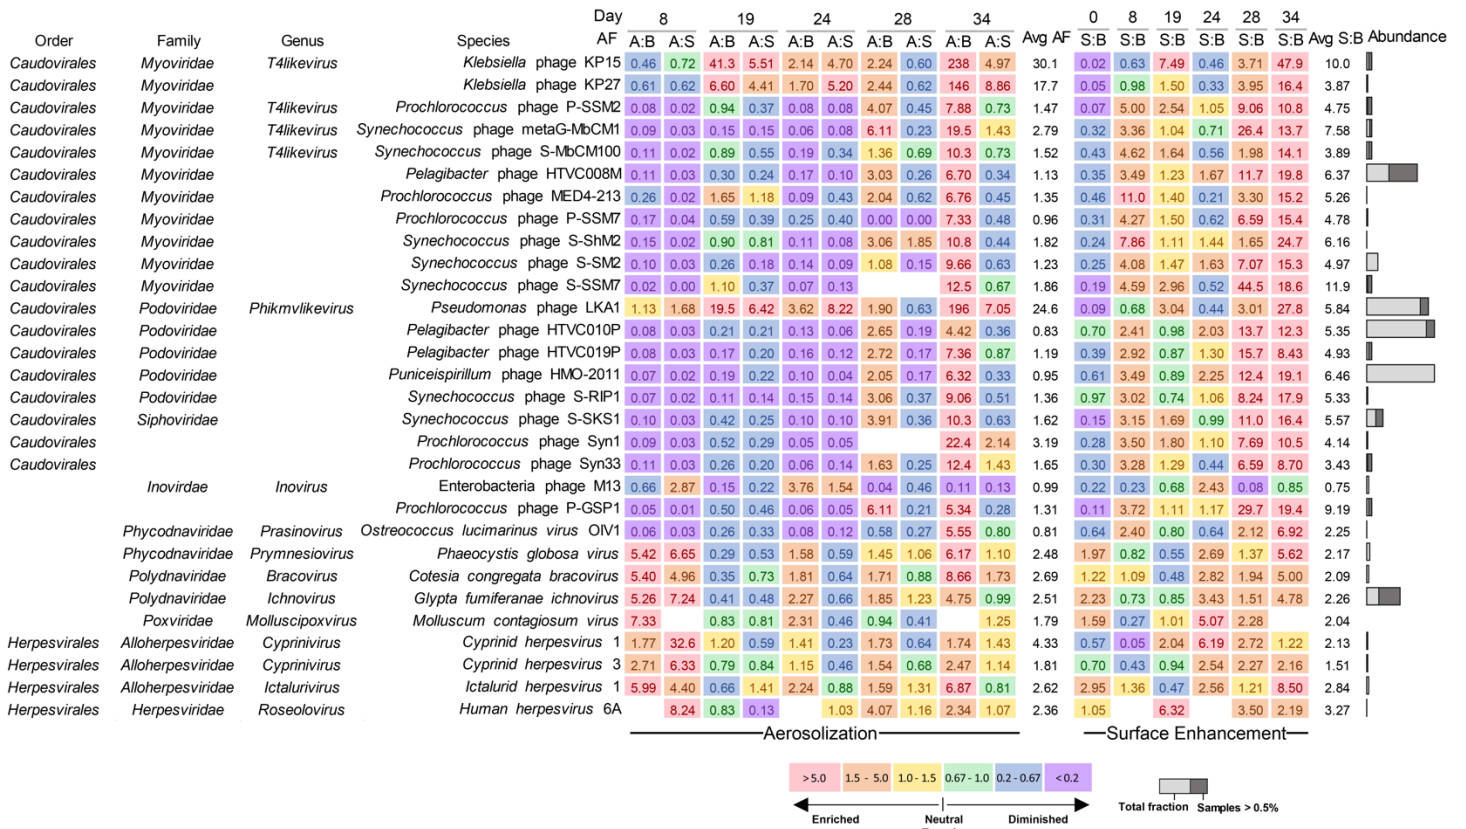

**Supplementary Fig. 9** Viral aerosolization and surface enhancement. Taxonomy, aerosolization factors, and surface enrichment of viral genomes in the abundance and genome coverage trimmed data set. Heat map column labels indicate day and measurement. Aerosolization factor is expressed as the fraction of genomes in aerosol to bulk or surface (A:B or A:S). Surface enrichment is the fraction in SSML to the fraction in the bulk (S:B). Heat map values indicate ratio values (bottom legend). Genome abundance is reported as the sum of fraction of the population across the experiment and as the number of samples above 0.5% of the population. Blanks indicate samples below threshold limit.

## 2. Supplementary Tables

Supplementary Table 1 DNA extraction yields

| Sample Date | Sample Type | Fraction | Total DNA recovered (ng) | Sample DNA concentration (ng mL <sup>-1</sup> )* | Sample Date | Sample Type | Fraction | Total DNA recovered (ng) | Sample DNA concentration (ng/mL <sup>-1</sup> )* |
|-------------|-------------|----------|--------------------------|--------------------------------------------------|-------------|-------------|----------|--------------------------|--------------------------------------------------|
| 7/3/14      | Bulk        | 3µm      | 1914.00                  | 1.91                                             | 7/27/14     | Bulk        | 3µm      | 1152.00                  | 5.76E-01                                         |
| 7/3/14      | Bulk        | 0.2µm    | 2850.00                  | 1.43                                             | 7/27/14     | Bulk        | 0.2µm    | 636.00                   | 3.18E-01                                         |
| 7/3/14      | Bulk        | 0.025µm  | 73.44                    | 1.47E-01                                         | 7/27/14     | Bulk        | 0.025µm  | 335.20                   | 3.35E-01                                         |
| 7/3/14      | SSML        | 3µm      | 307.20                   | 1.54                                             | 7/27/14     | SSML        | 3µm      | 765.60                   | 3.83                                             |
| 7/3/14      | SSML        | 0.2µm    | 628.80                   | 3.14                                             | 7/27/14     | SSML        | 0.2µm    | 1195.20                  | 5.98                                             |
| 7/3/14      | SSML        | 0.025µm  | 2.60                     | 1.30E-02                                         | 7/27/14     | SSML        | 0.025µm  | 251.33                   | 1.26                                             |
| 7/5/14      | Aerosol     | 3µm      | 0.75                     | 5.22E-07                                         | 7/27/14     | Aerosol     | 3µm      | 3.20                     | 1.44E-06                                         |
| 7/5/14      | Aerosol     | 0.2µm    | 0.80                     | 5.53E-07                                         | 7/27/14     | Aerosol     | 0.2µm    | 21.76                    | 9.07E-06                                         |
| 7/5/14      | Aerosol     | 0.025µm  | 8.01                     | 3.66E-06                                         | 7/27/14     | Aerosol     | 0.025µm  | 2.72                     | 1.10E-06                                         |
| 7/11/14     | Bulk        | 3µm      | 554.40                   | 2.77E-01                                         | 7/31/14     | Bulk        | 3µm      | 991.20                   | 4.96E-01                                         |
| 7/11/14     | Bulk        | 0.2µm    | 567.60                   | 2.84E-01                                         | 7/31/14     | Bulk        | 0.2µm    | 1248.00                  | 8.91E-01                                         |
| 7/11/14     | Bulk        | 0.025µm  | 4.61                     | 4.61E-03                                         | 7/31/14     | Bulk        | 0.025µm  | 344.40                   | 3.44E-01                                         |
| 7/11/14     | SSML        | 3µm      | 244.80                   | 1.22                                             | 7/31/14     | SSML        | 3µm      | 456.00                   | 2.28                                             |
| 7/11/14     | SSML        | 0.2µm    | 342.40                   | 1.71                                             | 7/31/14     | SSML        | 0.2µm    | 624.00                   | 3.12                                             |
| 7/11/14     | SSML        | 0.025µm  | 71.34                    | 3.57E-01                                         | 7/31/14     | SSML        | 0.025µm  | 305.87                   | 1.53                                             |
| 7/11/14     | Aerosol     | 3µm      | 6.09                     | 2.78E-06                                         | 7/31/14     | Aerosol     | 3µm      | 0.91                     | 3.80E-07                                         |
| 7/11/14     | Aerosol     | 0.2µm    | 220.73                   | 7.93E-05                                         | 7/31/14     | Aerosol     | 0.2µm    | 2.81                     | 1.17E-06                                         |
| 7/11/14     | Aerosol     | 0.025µm  | 3.38                     | 1.45E-06                                         | 7/31/14     | Aerosol     | 0.025µm  | 1.41                     | 5.87E-07                                         |
| 7/22/14     | Bulk        | 3µm      | 559.20                   | 2.80E-01                                         | 8/6/14      | Bulk        | 3µm      | 583.20                   | 2.92E-01                                         |
| 7/22/14     | Bulk        | 0.2µm    | 1344.00                  | 6.72E-01                                         | 8/6/14      | Bulk        | 0.2µm    | 696.00                   | 3.48E-01                                         |
| 7/22/14     | Bulk        | 0.025µm  | 375.20                   | 3.75E-01                                         | 8/6/14      | Bulk        | 0.025µm  | 584.40                   | 5.84E-01                                         |
| 7/22/14     | SSML        | 3µm      | 274.40                   | 1.37                                             | 8/6/14      | SSML        | 3µm      | 122.64                   | 6.13E-01                                         |
| 7/22/14     | SSML        | 0.2µm    | 342.40                   | 1.71                                             | 8/6/14      | SSML        | 0.2µm    | 378.00                   | 1.89                                             |
| 7/22/14     | SSML        | 0.025µm  | 248.00                   | 1.24                                             | 8/6/14      | SSML        | 0.025µm  | 115.44                   | 5.77E-01                                         |
| 7/22/14     | Aerosol     | 3µm      | 3.02                     | 1.26E-06                                         | 8/6/14      | Aerosol     | 3µm      | 1.26                     | 5.23E-07                                         |
| 7/22/14     | Aerosol     | 0.2µm    | 5.53                     | 2.30E-06                                         | 8/6/14      | Aerosol     | 0.2µm    | 3.06                     | 1.28E-06                                         |
| 7/22/14     | Aerosol     | 0.025µm  | 2.59                     | 1.20E-06                                         | 8/6/14      | Aerosol     | 0.025µm  | 1.06                     | 1.15E-06                                         |

\*Bulk and SSML measurements are per mL of seawater, aerosol is per mL of air



**Supplementary Table 2 Trimmed and filtered read statistics**

| Sample Name | Sequences (M) | Length (bp) | Percent GC | Sample Name | Sequences (M) | Length (bp) | Percent GC |
|-------------|---------------|-------------|------------|-------------|---------------|-------------|------------|
| 03B0025_R1  | 1.7           | 138         | 46%        | 27B0025_R1  | 1.9           | 138         | 43%        |
| 03B0025_R2  | 1.7           | 147         | 46%        | 27B0025_R2  | 1.9           | 145         | 43%        |
| 03B02_R1    | 4.1           | 147         | 46%        | 27B3_R1     | 5.4           | 136         | 48%        |
| 03B02_R2    | 4.1           | 137         | 46%        | 27B3_R2     | 5.4           | 147         | 48%        |
| 03B3_R1     | 4.8           | 147         | 47%        | 27S0025_R1  | 4.2           | 137         | 44%        |
| 03B3_R2     | 4.8           | 138         | 47%        | 27S0025_R2  | 4.2           | 148         | 44%        |
| 03S0025_R1  | 1.3           | 136         | 46%        | 27S02_R1    | 5.4           | 148         | 51%        |
| 03S0025_R2  | 1.3           | 147         | 46%        | 27S02_R2    | 5.4           | 138         | 51%        |
| 03S02_R1    | 1.5           | 138         | 46%        | 27S3_R1     | 5.0           | 137         | 46%        |
| 03S02_R2    | 1.5           | 147         | 46%        | 27S3_R2     | 5.0           | 147         | 46%        |
| 03S3_R1     | 1.1           | 147         | 46%        | 31A0025_R1  | 1.1           | 147         | 48%        |
| 03S3_R2     | 1.1           | 138         | 46%        | 31A0025_R2  | 1.1           | 136         | 48%        |
| 05A0025_R1  | 0.8           | 137         | 48%        | 31A02_R1    | 1.3           | 147         | 48%        |
| 05A0025_R2  | 0.8           | 147         | 48%        | 31A02_R2    | 1.3           | 137         | 48%        |
| 05A02_R1    | 2.3           | 138         | 48%        | 31A3_R1     | 0.7           | 137         | 47%        |
| 05A02_R2    | 2.3           | 147         | 48%        | 31A3_R2     | 0.7           | 146         | 47%        |
| 05A3_R1     | 1.7           | 147         | 45%        | 31B0025_R1  | 1.4           | 147         | 47%        |
| 05A3_R2     | 1.7           | 137         | 45%        | 31B0025_R2  | 1.4           | 137         | 47%        |
| 11A0025_R1  | 1.0           | 147         | 46%        | 31B02_R1    | 6.4           | 148         | 49%        |
| 11A0025_R2  | 1.0           | 137         | 46%        | 31B02_R2    | 6.4           | 138         | 49%        |
| 11A02_R1    | 6.8           | 148         | 52%        | 31B3_R1     | 8.7           | 137         | 48%        |
| 11A02_R2    | 6.8           | 139         | 52%        | 31B3_R2     | 8.7           | 147         | 48%        |
| 11A3_R1     | 3.3           | 147         | 52%        | 31S0025_R1  | 2.3           | 136         | 45%        |
| 11A3_R2     | 3.3           | 138         | 52%        | 31S0025_R2  | 2.3           | 147         | 45%        |
| 11B0025_R1  | 0.7           | 138         | 44%        | 31S02_R1    | 10.7          | 148         | 51%        |
| 11B0025_R2  | 0.7           | 147         | 44%        | 31S02_R2    | 10.7          | 139         | 51%        |
| 11B02_R1    | 5.3           | 148         | 51%        | 31S3_R1     | 1.7           | 146         | 48%        |
| 11B02_R2    | 5.3           | 138         | 51%        | 31S3_R2     | 1.7           | 134         | 48%        |
| 11B3_R1     | 2.0           | 147         | 50%        | 86_27B02_R1 | 9.7           | 139         | 51%        |
| 11B3_R2     | 2.0           | 138         | 50%        | 86_27B02_R2 | 9.7           | 148         | 51%        |
| 11S0025_R1  | 5.7           | 148         | 43%        | 86A0025_R1  | 1.5           | 147         | 49%        |
| 11S0025_R2  | 5.7           | 140         | 43%        | 86A0025_R2  | 1.5           | 138         | 49%        |
| 11S02_R1    | 1.6           | 147         | 51%        | 86A02_R1    | 1.1           | 147         | 50%        |
| 11S02_R2    | 1.6           | 135         | 51%        | 86A02_R2    | 1.1           | 137         | 50%        |
| 11S3_R1     | 1.4           | 137         | 49%        | 86A3_R1     | 1.0           | 147         | 49%        |
| 11S3_R2     | 1.4           | 147         | 49%        | 86A3_R2     | 1.0           | 138         | 49%        |
| 18B3_02_R1  | 1.8           | 136         | 47%        | 86Ad_R1     | 1.4           | 147         | 48%        |
| 18B3_02_R2  | 1.8           | 147         | 47%        | 86Ad_R2     | 1.4           | 137         | 48%        |
| 22A0025_R1  | 0.7           | 147         | 45%        | 86B0025_R1  | 8.6           | 148         | 53%        |
| 22A0025_R2  | 0.7           | 137         | 45%        | 86B0025_R2  | 8.6           | 140         | 53%        |
| 22A02_R1    | 1.0           | 137         | 49%        | 86B3_R1     | 6.1           | 136         | 49%        |
| 22A02_R2    | 1.0           | 147         | 49%        | 86B3_R2     | 6.1           | 147         | 49%        |
| 22A3_R1     | 1.0           | 137         | 46%        | 86Bd_R1     | 1.1           | 138         | 50%        |
| 22A3_R2     | 1.0           | 147         | 46%        | 86Bd_R2     | 1.1           | 147         | 50%        |
| 22B0025_R1  | 2.5           | 137         | 43%        | 86S0025_R1  | 2.1           | 147         | 47%        |
| 22B0025_R2  | 2.5           | 148         | 43%        | 86S0025_R2  | 2.1           | 138         | 47%        |
| 22B02_R1    | 9.3           | 140         | 49%        | 86S02_R1    | 1.0           | 138         | 51%        |
| 22B02_R2    | 9.3           | 148         | 49%        | 86S02_R2    | 1.0           | 147         | 51%        |
| 22B3_R1     | 4.6           | 139         | 45%        | 86S3_R1     | 1.3           | 146         | 47%        |
| 22B3_R2     | 4.6           | 147         | 45%        | 86S3_R2     | 1.3           | 135         | 47%        |
| 22S0025_R1  | 4.7           | 148         | 43%        | 86Sd_R1     | 1.3           | 137         | 48%        |
| 22S0025_R2  | 4.7           | 138         | 42%        | 86Sd_R2     | 1.3           | 147         | 48%        |
| 22S02_R1    | 6.8           | 138         | 48%        | 87CA02_R1   | 0.6           | 137         | 46%        |
| 22S02_R2    | 6.8           | 148         | 49%        | 87CA02_R2   | 0.6           | 146         | 46%        |
| 22S3_R1     | 2.1           | 147         | 46%        | 87CA3_R1    | 4.7           | 147         | 51%        |
| 22S3_R2     | 2.1           | 137         | 46%        | 87CA3_R2    | 4.7           | 137         | 51%        |
| 27_86B02_R1 | 2.9           | 148         | 51%        | 88B02_R1    | 2.5           | 136         | 50%        |
| 27_86B02_R2 | 2.9           | 136         | 51%        | 88B02_R2    | 2.5           | 147         | 50%        |
| 27A0025_R1  | 1.0           | 137         | 47%        | 88B3_R1     | 1.0           | 138         | 47%        |
| 27A0025_R2  | 1.0           | 147         | 47%        | 88B3_R2     | 1.0           | 147         | 47%        |
| 27A02_R1    | 3.2           | 137         | 54%        | 88BS3_02_R1 | 1.6           | 147         | 48%        |
| 27A02_R2    | 3.2           | 147         | 54%        | 88BS3_02_R2 | 1.6           | 137         | 47%        |
| 27A3_R1     | 0.9           | 138         | 50%        | mbla_R1     | 1.7           | 138         | 49%        |
| 27A3_R2     | 0.9           | 147         | 50%        | mbla_R2     | 1.7           | 147         | 49%        |
| AVERAGE     | 3.0           | 142.3       | 47.9%      |             |               |             |            |
| MIN         | 0.6           | 134.0       | 42.0%      |             |               |             |            |
| MAX         | 10.7          | 148.0       | 54.0%      |             |               |             |            |

Supplementary Table 3 Spatial coverage of scaffolds to Kraken assigned genomes

| Taxonomy                                   | scaffold size (nts) | spatial coverage (nts) | spatial coverage (%) | Taxonomy                               | scaffold size (nts) | spatial coverage (nts) | spatial coverage (%) |
|--------------------------------------------|---------------------|------------------------|----------------------|----------------------------------------|---------------------|------------------------|----------------------|
| <i>Acinetobacter calcoaceticus</i>         | 4110074             | 17174                  | 0.4%                 | <i>Pelagibacter</i> phage HTVC008M     | 147284              | 92310                  | 62.7%                |
| <i>Alcanivorax dieselolei</i>              | 4928223             | 203641                 | 4.1%                 | <i>Pelagibacter</i> phage HTVC010P     | 34892               | 23275                  | 66.7%                |
| <i>alpha proteobacterium</i> HIMB5         | 1343202             | 4965                   | 0.4%                 | <i>Pelagibacter</i> phage HTVC019P     | 42084               | 16404                  | 39.0%                |
| <i>alpha proteobacterium</i> HIMB59        | 1410127             | 21163                  | 1.5%                 | <i>Phaeobacter gallaeciensis</i>       | 4061725             | 13031                  | 0.3%                 |
| <i>Alteromonas macleodii</i>               | 4575623             | 1917348                | 41.9%                | <i>Phaeobacter inhibens</i>            | 2041825.5           | 7261.5                 | 0.5%                 |
| <i>Bacillus cereus</i>                     | 5295158             | 186859                 | 3.5%                 | <i>Phaeocystis globosa</i> virus       | 459984              | 826                    | 0.2%                 |
| <i>Bacteroides vulgatus</i>                | 5163189             | 27842                  | 0.5%                 | <i>Polymorphum gilvum</i>              | 4649365             | 18001                  | 0.4%                 |
| <i>Blastococcus saxobidens</i>             | 4875340             | 9395                   | 0.2%                 | <i>Prochlorococcus marinus</i>         | 1657990             | 296810                 | 17.9%                |
| <i>Bradyrhizobium diazoefficiens</i>       | 9105828             | 10991                  | 0.1%                 | <i>Prochlorococcus</i> phage MED4-213  | 180977              | 989                    | 0.5%                 |
| <i>Burkholderia xenovorans</i>             | 3243713             | 13728                  | 0.4%                 | <i>Prochlorococcus</i> phage P-GSP1    | 44945               | 1136                   | 2.5%                 |
| <i>Candidatus Pelagibacter ubique</i>      | 1395018             | 27281                  | 2.0%                 | <i>Prochlorococcus</i> phage P-SSM2    | 252407              | 300                    | 0.1%                 |
| <i>Candidatus Puniceispirillum marinum</i> | 2753527             | 33134                  | 1.2%                 | <i>Prochlorococcus</i> phage P-SSM7    | 182180              | 3175                   | 1.7%                 |
| <i>Cellulophaga algicola</i>               | 4888353             | 8416                   | 0.2%                 | <i>Prochlorococcus</i> phage Syn1      | 191195              | 4277                   | 2.2%                 |
| <i>Cellulophaga lytica</i>                 | 3824196             | 20408                  | 0.5%                 | <i>Prochlorococcus</i> phage Syn33     | 174285              | 4976                   | 2.9%                 |
| <i>Corynebacterium aurimucosum</i>         | 1409613             | 23234                  | 4.8%                 | <i>Propionibacterium acnes</i>         | 2519002             | 2450832                | 97.3%                |
| <i>Corynebacterium kroppenstedtii</i>      | 2446804             | 4844                   | 0.2%                 | <i>Pseudomonas fluorescens</i>         | 6143950             | 46014                  | 0.7%                 |
| <i>Cotesia congregata bracovirus</i>       | 28766               | 157.5                  | 0.7%                 | <i>Pseudomonas fulva</i>               | 4920769             | 6930                   | 0.1%                 |
| <i>Croceibacter atlanticus</i>             | 2952962             | 14005                  | 0.5%                 | <i>Pseudomonas mendocina</i>           | 5072807             | 428758                 | 8.5%                 |
| <i>Cyclobacterium marinum</i>              | 6221273             | 15968                  | 0.3%                 | <i>Pseudomonas</i> phage LKA1          | 41593               | 13016                  | 31.3%                |
| <i>Cyprinid herpesvirus 1</i>              | 291144              | 1044                   | 0.4%                 | <i>Pseudomonas putida</i>              | 6870827             | 408056                 | 5.9%                 |
| <i>Cyprinid herpesvirus 3</i>              | 295146              | 316                    | 0.1%                 | <i>Pseudomonas stutzeri</i>            | 4709064             | 1620871                | 34.4%                |
| <i>Dinoroseobacter shibae</i>              | 869114.4            | 39816.4                | 25.4%                | <i>Puniceispirillum</i> phage HMO-2011 | 55282               | 5830                   | 10.5%                |
| <i>Enterobacteria</i> phage M13            | 6407                | 636                    | 9.9%                 | <i>Rahnella aquatilis</i>              | 2766562             | 3868                   | 0.1%                 |
| <i>Erythrobacter litoralis</i>             | 3251353             | 3890                   | 0.1%                 | <i>Ralstonia pickettii</i>             | 1775243             | 10757                  | 0.4%                 |
| <i>Flavobacterium indicum</i>              | 2993089             | 5620                   | 0.2%                 | <i>Rhodanobacter denitrificans</i>     | 4225490             | 10225                  | 0.2%                 |
| <i>Fusobacterium nucleatum</i>             | 2443126             | 3274                   | 0.1%                 | <i>Rhodobacter capsulatus</i>          | 1939560             | 2742.5                 | 0.2%                 |
| <i>Geodermatophilus obscurus</i>           | 5322497             | 18786                  | 0.4%                 | <i>Rhodobacter sphaeroides</i>         | 1461698             | 2004.33                | 0.3%                 |
| <i>Glypta fumiferanae ichnovirus</i>       | 3141                | 568                    | 18.1%                | <i>Rhodococcus erythropolis</i>        | 3297806             | 18933                  | 0.4%                 |
| <i>Gordonia polyisoprenivorans</i>         | 2922149.5           | 1953                   | 0.2%                 | <i>Rhodococcus opacus</i>              | 4229686.5           | 2595.5                 | 0.1%                 |
| <i>Human herpesvirus 6A</i>                | 156714              | 363                    | 0.2%                 | <i>Roseobacter denitrificans</i>       | 1081352.5           | 2596.25                | 1.8%                 |
| <i>Ictalurid herpesvirus 1</i>             | 134226              | 321                    | 0.2%                 | <i>Roseobacter litoralis</i>           | 1550624             | 6759                   | 5.2%                 |
| <i>Idiomarina loihiensis</i>               | 2839759             | 13167                  | 0.5%                 | <i>Rothia mucilaginoso</i>             | 2292716             | 311952                 | 13.6%                |
| <i>Ketogulonicigenium vulgare</i>          | 1516261             | 4392                   | 0.4%                 | <i>Ruegeria pomeroyi</i>               | 2300524             | 5500                   | 0.2%                 |
| <i>Klebsiella</i> phage KP15               | 174436              | 87598                  | 50.2%                | <i>Serratia marcescens</i>             | 5207023             | 16976                  | 0.3%                 |
| <i>Klebsiella</i> phage KP27               | 174413              | 73104                  | 41.9%                | <i>Sphingobium japonicum</i>           | 884972.4            | 11099.8                | 4.6%                 |
| <i>Legionella pneumophila</i>              | 3409143             | 55709                  | 1.6%                 | <i>Sphingomonas wittichii</i>          | 1971748.7           | 14816                  | 4.7%                 |
| <i>Leisingera methylohalidorans</i>        | 1550332             | 5559.67                | 0.2%                 | <i>Sphingopyxis alaskensis</i>         | 1686856.5           | 34968.5                | 45.1%                |
| <i>Marinobacter adhaerens</i>              | 2304688             | 488703.5               | 17.6%                | <i>Staphylococcus epidermidis</i>      | 2454929             | 240828                 | 9.8%                 |
| <i>Marinobacter hydrocarbonoclasticus</i>  | 3989480             | 411335                 | 10.3%                | <i>Stenotrophomonas maltophilia</i>    | 4769156             | 56540                  | 1.2%                 |
| <i>Methylobacterium radiotolerans</i>      | 1685848             | 319342.25              | 10.3%                | <i>Streptococcus suis</i>              | 2028815             | 54495                  | 2.7%                 |
| <i>Methylophaga frappieri</i>              | 1372645             | 27145                  | 3.5%                 | <i>Streptococcus thermophilus</i>      | 1796846             | 315319                 | 17.5%                |
| <i>Methylophaga nitratreducentescens</i>   | 3137191             | 656987                 | 20.9%                | <i>Sulfurimonas denitrificans</i>      | 2201561             | 5508                   | 0.3%                 |
| <i>Micrococcus luteus</i>                  | 2501097             | 302946                 | 12.1%                | <i>Synechococcus</i> phage metaG-MbCM1 | 172879              | 132028                 | 76.4%                |
| <i>Molluscum contagiosum</i> virus         | 190289              | 709                    | 0.4%                 | <i>Synechococcus</i> phage S-MbCM100   | 170438              | 15176                  | 8.9%                 |
| <i>Moraxella catarrhalis</i>               | 1887974             | 4629                   | 0.2%                 | <i>Synechococcus</i> phage S-RIP1      | 44892               | 2746                   | 6.1%                 |
| <i>Mycobacterium avium</i>                 | 5011264             | 12848                  | 0.3%                 | <i>Synechococcus</i> phage S-ShM2      | 179563              | 2432                   | 1.4%                 |
| <i>Mycobacterium chubuense</i>             | 3099500.5           | 1291.5                 | 0.2%                 | <i>Synechococcus</i> phage S-SKS1      | 208007              | 44401                  | 21.3%                |
| <i>Nakamurella multipartita</i>            | 6060298             | 245383                 | 4.0%                 | <i>Synechococcus</i> phage S-SM2       | 190789              | 2506                   | 1.3%                 |
| <i>Nonlabens dokdonensis</i>               | 3914632             | 8829                   | 0.2%                 | <i>Synechococcus</i> phage S-SSM7      | 232878              | 450                    | 0.2%                 |
| <i>Novosphingobium aromaticivorans</i>     | 1873023             | 17855                  | 1.7%                 | <i>Thalassolituus oleivorans</i>       | 3764053             | 24088                  | 0.6%                 |
| <i>Octadecabacter antarcticus</i>          | 4812600             | 5381                   | 0.1%                 | <i>Variovorax paradoxus</i>            | 5626353             | 6430                   | 0.1%                 |
| <i>Octadecabacter arcticus</i>             | 5200279             | 5393                   | 0.1%                 | <i>Zunongwangia profunda</i>           | 5128187             | 52302                  | 1.0%                 |
| <i>Ostreococcus lucimarinus</i> virus OIV1 | 194022              | 69241                  | 35.7%                |                                        |                     |                        |                      |
| <i>Paracoccus denitrificans</i>            | 2291189.5           | 9244.5                 | 0.4%                 |                                        |                     |                        |                      |

**Supplementary Table 4 CheckM statistics of genome bins**

| Bin name                          | Label                             | BACT completeness | BACT contamination | BACT strain-heterogeneity | genome size (bp) | # scaffolds |
|-----------------------------------|-----------------------------------|-------------------|--------------------|---------------------------|------------------|-------------|
| np-bin7-pan.bin7_1                | <i>Legionella</i> sp.             | 100               | 0                  | 0                         | 2886101          | 95          |
| outliers                          | Roseobacter fragments             | n/a               | n/a                | n/a                       |                  |             |
| np-bin4                           | <i>Methylophaga</i> sp.           | 100               | 1.72               | 100                       | 2541903          | 61          |
| pangenome_np-bin7_2-pan.bin7_2_14 | Diatom fragment                   | 12.93             | 0                  | 0                         | 146965           | 19          |
| pangenome_np-bin7_2-pan.bin7_2_2  | <i>Polaribacter</i> sp.           | 55.02             | 10.19              | 5.26                      | 1354003          | 166         |
| pangenome_np-bin7_2-pan.bin7_2_3  | Phage 1                           | 0                 | 0                  | 0                         | 977327           | 76          |
| pangenome_np-bin7_2-pan.bin7_2_13 | Phage 2                           | 0                 | 0                  | 0                         | 356493           | 22          |
| pangenome_np-bin7_2-pan.bin7_2_5  | <i>Erythrobacter</i> sp.          | 97.96             | 0                  | 0                         | 2558218          | 49          |
| pangenome_np-bin7_2-pan.bin7_2_6  | Roseobacter fragments             | 12.85             | 3.45               | 52                        | 543659           | 49          |
| np-bin5                           | <i>Escherichia coli</i>           | 96.55             | 0                  | 0                         | 4486681          | 170         |
| pangenome_np-bin7_2-pan.bin7_2_9  | Roseobacter fragments             | 10.34             | 0                  | 0                         | 184708           | 27          |
| pangenome_np-bin7_2-pan.bin7_2_8  | Phage 3                           | 0                 | 0                  | 0                         | 416069           | 27          |
| pangenome_np-bin7_2-pan.bin7_2_0  | Roseobacter fragments             | 19.2              | 4.55               | 11.11                     | 2970438          | 403         |
| np-bin6                           | Delta proteobacteria              | 46.16             | 1.72               | 100                       | 746461           | 86          |
| np-bin3                           | Gamma proteobacteria              | 29.86             | 1.72               | 0                         | 1709939          | 224         |
| pangenome_np-bin7_2-pan.bin7_2_4  | NCLDV                             | 1.41              | 0                  | 0                         | 545842           | 57          |
| pangenome_np-bin7_2-pan.bin7_2_7  | Roseobacter fragments             | 1.72              | 0                  | 0                         | 178918           | 28          |
| np-bin2                           | <i>Novosphingobium</i> sp.        | 5.8               | 0                  | 0                         | 282480           | 44          |
| pangenome_np-bin7_2-pan.bin7_2_12 | Roseobacter frags + contamination | 0                 | 0                  | 0                         | 241080           | 24          |
| pangenome_np-bin7_2-pan.bin7_2_10 | Phage 4                           | 0                 | 0                  | 0                         | 490666           | 26          |
| np-bin1                           | <i>Roseovarius</i> sp.            | 80.88             | 1.72               | 100                       | 3387409          | 126         |
| pangenome_np-bin7_2-pan.bin7_2_11 | Phage 5                           | 0                 | 0                  | 0                         | 384320           | 24          |
| pangenome_np-bin7_2-pan.bin7_2_1  | <i>Roseobacter</i> sp.            | 74.61             | 0                  | 0                         | 4280636          | 394         |
| np-bin8                           | Roseobacter fragments             |                   |                    |                           |                  |             |
| np-bin9                           | Roseobacter fragments             |                   |                    |                           |                  |             |

**Supplementary Table 5 Genome bin summaries**

| Genome bin | Annotation                           | Genome summary                                                                                                                                                                                                                                                                                                                                                                                                                                                                                     |
|------------|--------------------------------------|----------------------------------------------------------------------------------------------------------------------------------------------------------------------------------------------------------------------------------------------------------------------------------------------------------------------------------------------------------------------------------------------------------------------------------------------------------------------------------------------------|
| NP1        | <i>Roseovarius</i> sp.               | The assembly is consistently annotated at <i>Roseovarius</i> based on ribosomal proteins and other conserved genes. The organism possesses microcompartments (ethanolamine) co-localized with polyamine uptake, which appears to be a novel system. Formate dehydrogenase suggests some C1 metabolism. This is the most abundant draft genome and is enriched in several aerosol samples.                                                                                                          |
| NP2        | <i>Novosphingobium</i> sp.           | The assembly is consistently annotated as <i>Novosphingobium</i> but is an incomplete genome. It was very rare except at the beginning of the experiment.                                                                                                                                                                                                                                                                                                                                          |
| NP3        | Gamma proteobacteria 1               | The genome is indicated as a SAR92/OM6 species, which possesses a Ni/Fe-dependent hydrogenase, a PQQ-dependent glucose dehydrogenase, and genes implicated in sulfur oxidation. It is relatively abundant throughout the experiment and generally evenly distributed between phases (bulk, SSML, and aerosol).                                                                                                                                                                                     |
| NP4        | <i>Methylophaga</i> sp.              | The assembly indicates a methylotroph, but unlike the closest reference genomes, it appears to lack NO reductase, dissimilatory nitrite reductase, and N <sub>2</sub> O reductase. Instead it appears to have assimilatory nitrate and nitrite reductase. This species (bin) is most abundant early in the bloom.                                                                                                                                                                                  |
| NP5        | <i>Escherichia coli</i> strain CAICE | The genome is annotated as <i>E. coli</i> but does not appear to have a Type III secretion system or many of the hallmarks of pathogenesis. It contains genes for capsular polysaccharide synthesis and multiple siderophore biosynthesis and uptake systems. The species is abundant in aerosols, particularly in the beginning of the experiment but is present throughout the experiment.                                                                                                       |
| NP6        | Delta proteobacteria 1               | The genome indicates a basal deltaproteobacteria based on the phylogeny of r proteins.                                                                                                                                                                                                                                                                                                                                                                                                             |
| NP8        | Roseobacter fragments 1              | This bin is annotated as a <i>Roseobacter</i> and is rare during the experiment.                                                                                                                                                                                                                                                                                                                                                                                                                   |
| NP9        | Roseobacter fragments 2              | This bin is very abundant particularly in the aerosol samples towards the end of the bloom. It contains a putative <i>rbcL/rbcS</i> gene cluster (carbon fixation via ribulose-bisphosphate carboxylase/oxygenase) and aerobic formate dehydrogenase-like protein (often can be hydrocarbon degrading).                                                                                                                                                                                            |
| 7_1        | <i>Legionella</i> sp.                | Most ORFs have the highest amino acid similarity to <i>Legionella pneumophila</i> or <i>drancourtii</i> (70–80% identity) and represent a unique species, likely from a sister genus. The genome contains both Type II and Type IV secretion systems (Lsp and Dot/ICM respectively) as well as several ORFs with highest identity to eukaryotes. The genome also contains a Ni/Fe hydrogenase. The species is motile and competent. It is most abundant early and found throughout the experiment. |
| 7_2_0      | Roseobacter fragments 6              | This <i>Roseobacter</i> genome is most abundant in the water on day 8 of the experiment. It contains several elements of denitrification, including nitrite (Cu) reductase, nitric oxide reductase. It is generally enriched in the aerosol phase.                                                                                                                                                                                                                                                 |
| 7_2_1      | <i>Roseobacter</i> sp.               | The assembly yielded a moderately sized <i>Roseobacter</i> genome. It was abundant at the bloom peak, particularly in the aerosols. It contains a putative <i>rbcL/rbcS</i> gene cluster, in addition to nitrite reductase (Cu) and nitric oxide reductase. It may couple denitrification to carbon fixation.                                                                                                                                                                                      |
| 7_2_2      | <i>Polaribacter</i> sp.              | The genome consistently suggests a basal Flavobacteria. It contains a Ni/Fe hydrogenase. It is mostly water-borne and is most abundant during middle of the experiment.                                                                                                                                                                                                                                                                                                                            |
| 7_2_3      | Phage 1                              | The assembly is likely a Roseophage (phage of <i>Roseobacteria</i> ) based on the similarity of auxiliary metabolic proteins and the presence of clear orthologs for pelagiphage. The large size of the genome indicates this is probably not a single viral species and reflect many similar viral genomes.                                                                                                                                                                                       |
| 7_2_4      | NCLDV                                | This genome comprised a large bin with many hits to <i>Marseillevirus</i> .                                                                                                                                                                                                                                                                                                                                                                                                                        |
| 7_2_5      | <i>Erythrobacter</i> sp.             | This species was abundant throughout the experiment, though most abundant towards the conclusion (Extended Data Fig. 5). It was generally found throughout all sample types.                                                                                                                                                                                                                                                                                                                       |
| 7_2_6      | Roseobacter fragments 3              | This genome is abundant towards end of the experiment and was generally enriched in aerosols.                                                                                                                                                                                                                                                                                                                                                                                                      |
| 7_2_7      | Roseobacter fragments 4              | This assembly was rare throughout the experiment.                                                                                                                                                                                                                                                                                                                                                                                                                                                  |
| 7_2_8      | Phage 3                              | This assembly blooms at the end of the experiment in the 0.025 μm fraction. The abundance of <i>Roseobacter</i> and alpha-proteobacterial proteins, in addition to the clear phage genes (head, tail, baseplate wedge), indicate it a phage of these bacteria.                                                                                                                                                                                                                                     |
| 7_2_9      | Roseobacter fragments 5              | This assembly possibly contains a set of mobile genetic elements like plasmids. For example, much of the machinery for conjugal transfer (pilus, reverse transcriptase, resolvase, endonucleases, mate pair stabilization proteins), are present in this bin. It contains abundant <i>Roseobacter</i> elements and nitric oxide reductase and was present throughout the experiment.                                                                                                               |
| 7_2_10     | Phage 4                              | Assembly indicates a phage with clear orthologs for tail, head, baseplate, but it is difficult to identify the host. A spike in abundance in the >3 μm fraction was followed by being very abundant in viral size fraction (0.025–0.2 μm) after the last two time points, with distributions in pretty much every substrate. This may indicate an early infection and burst event.                                                                                                                 |
| 7_2_11     | Phage 5                              | Assembly indicates a phage with clear orthologs for tail, head, baseplate, but it is difficult to identify the host. An abundance in the 0.025–0.2 μm fraction shifts to an increasing abundance in larger size fractions, and then reverts back to an increased amount in the 0.025–0.2 μm fraction indicating a possible transition from free phage, to infection of the host, and then to a burst releasing progeny phage.                                                                      |
| 7_2_13     | Phage 2                              | Based on the similarity of auxiliary metabolic proteins and the presence of clear orthologs for pelagiphage this assembly likely represents a phage for <i>Roseobacteria</i> . It is most abundant early in the experiment and is primarily absent from later time points.                                                                                                                                                                                                                         |
| 7_2_14     | Diatom fragment                      | This bin represents a diatom genome fragment. It includes several photosystem proteins, indicating it is likely a portion of the chloroplast genome, which is far more abundant than the nuclear chromosomes <sup>7</sup> . It is most abundant during the peak of the bloom in bulk, >3 μm fraction samples.                                                                                                                                                                                      |

**Supplementary Table 6 Analysis of draft genomes using k-mer based taxonomic profiling**

| Draft genome                                   | Kraken Assignment                   | Assembly characteristics                 | Genome size (bp) | No. of Contigs | % complete |
|------------------------------------------------|-------------------------------------|------------------------------------------|------------------|----------------|------------|
| JCVI_CAICE_Erythrobacter_1                     | Erythrobacter litoralis             |                                          | 2558218          | 49             | 97.96      |
| JCVI_CAICE_Novosphingobium_1                   | Novosphingobium aromaticivorans     |                                          | 282480           | 44             | 5.8        |
| JCVI_CAICE_Methylophaga_1                      | Methylophaga nitratireducentiscrens | Many core methophaga genes               | 2541903          | 61             | 100        |
| JCVI_CAICE_Gammaproteobacterium_1              | Gammaproteobacterium HdN1           | Basal gammaproteobacteria, SAR92         | 1709939          | 224            | 29.86      |
| JCVI_CAICE_Escherichia coli_1                  | Escherichia coli                    |                                          | 4486681          | 170            | 96.55      |
| JCVI_CAICE_Legionella_1                        | Legionella pneumophila              |                                          | 2886101          | 95             | 100        |
| JCVI_CAICE_Polaribacter_1                      | Polaribacter sp. MED152             |                                          | 1354003          | 166            | 55.02      |
| JCVI_CAICE_Deltaproteobacterium_1              | Candatus Babela massiliensis        | Basal deltaproteobacteria                | 746461           | 86             | 46.16      |
| JCVI_CAICE_Diatom_Fragment_1                   | Synechococcus sp. PCC_6312          |                                          | 146965           | 19             | 12.93      |
| JCVI_CAICE_Roseobacter_1                       | Ruegeria pomeroyi                   |                                          | 4280636          | 394            | 74.61      |
| JCVI_CAICE_Roseovarius_1                       | Ruegeria pomeroyi                   |                                          | 3387409          | 126            | 80.88      |
| JCVI_CAICE_Roseobacter_fragments_1             | -                                   |                                          |                  |                |            |
| JCVI_CAICE_Roseobacter_fragments_2             | Rhodobacter sphaeroides             |                                          |                  |                |            |
| JCVI_CAICE_Roseobacter_fragments_3             | Dinoroseobacter shibae              |                                          | 543659           | 49             | 12.85      |
| JCVI_CAICE_Roseobacter_fragments_4             | Bacillus infantis                   | Portion of roseobacter                   | 178918           | 28             | 1.72       |
| JCVI_CAICE_Roseobacter_fragments_5             | Erythrobacter litoralis             |                                          | 184708           | 27             | 10.34      |
| JCVI_CAICE_Roseobacter_fragments_6             | Ruegeria pomeroyi                   | Missing core roseobacter genes           | 2970438          | 403            | 19.2       |
| JCVI_CAICE_Roseobacter_fragments_7             | Leisingera methylohalidivorans      |                                          |                  |                |            |
| JCVI_CAICE_Roseobacter_fragments_contamination | Pseudomonas phage LKA1              | Both alphaproteobacteria and roseobacter | 241080           | 24             | 0          |
| JCVI_CAICE_NCLDV_1                             | -                                   |                                          | 545842           | 57             | 1.41       |
| JCVI_CAICE_Phage_1                             | Puniceispirillum phage HMO-2011     | Large, T7-like                           | 977327           | 76             | 0          |
| JCVI_CAICE_Phage_2                             | Synechococcus phage ACG-2014c       | Probable roseobacteria phage             | 356493           | 22             | 0          |
| JCVI_CAICE_Phage_3                             | -                                   |                                          | 416069           | 27             | 0          |
| JCVI_CAICE_Phage_4                             | Cotesia congregata bracovirus       | Possible gammaproteobacteria phage       | 490666           | 26             | 0          |
| JCVI_CAICE_Phage_5                             | -                                   |                                          | 384320           | 24             | 0          |

Taxonomic assignment of assembled metagenomics scaffolds using k-mer analysis (Kraken) with NCBI Refseq database. Assembled draft genomes identified utilizing APIS and manual curation. The assemblies were analyzed by Kraken to yield taxonomic assignments for comparison to raw read generated assignments. More complete genomes resulted in more accurate Kraken assignments. The diatom fragment derived from a chloroplast genome resulting in a cyanobacterial annotation in Kraken.

**Supplementary Table 7 Population statistics for partially trimmed, fully trimmed, pooled, and day-resolved data sets**

|                  |         | AD - Value | P- Value | Skewness | Kurtosis | Mean   | Std Dev | CV                    | Range | Minimum | Median | Maximum | N    |
|------------------|---------|------------|----------|----------|----------|--------|---------|-----------------------|-------|---------|--------|---------|------|
| Bacteria         | ALL A:B | 25.91      | <0.0050  | 0.726    | 2.184    | -0.019 | 0.374   | -1985                 | 3.91  | -1.59   | -0.05  | 2.33    | 3550 |
|                  | ALL A:S | 17.25      | <0.0050  | 0.537    | 2.287    | -0.070 | 0.357   | -512                  | 4.02  | -1.63   | -0.08  | 2.39    | 3550 |
|                  | ALL AF  | 43.35      | <0.0050  | 0.644    | 2.256    | -0.044 | 0.367   | -828                  | 4.02  | -1.63   | -0.07  | 2.39    | 7100 |
|                  | ALL S:B | -          | <0.0050  | 0.328    | 4.848    | 0.057  | 0.243   | 423                   | 3.31  | -1.20   | 0.04   | 2.11    | 4260 |
| Bacteria Trimmed | ALL A:B | 4.47       | <0.0050  | 0.945    | 1.765    | 0.097  | 0.501   | 516                   | 3.31  | -0.98   | 0.03   | 2.33    | 380  |
|                  | ALL A:S | 3.54       | <0.0050  | 0.737    | 2.214    | 0.036  | 0.482   | 1352                  | 3.99  | -1.60   | 0.02   | 2.39    | 380  |
|                  | ALL AF  | 7.70       | <0.0050  | 0.848    | 1.981    | 0.066  | 0.492   | 742                   | 3.99  | -1.60   | 0.02   | 2.39    | 760  |
|                  | ALL S:B | 14.42      | <0.0050  | 0.914    | 6.551    | 0.072  | 0.325   | 452                   | 3.31  | -1.20   | 0.03   | 2.11    | 456  |
| Virus            | ALL A:B | 4.85       | <0.0050  | -0.491   | -0.473   | -0.010 | 0.651   | -6508                 | 3.40  | -1.78   | 0.21   | 1.62    | 224  |
|                  | ALL A:S | 1.98       | <0.0050  | -0.300   | 0.257    | -0.285 | 0.665   | -233                  | 3.95  | -2.44   | -0.23  | 1.51    | 223  |
|                  | ALL AF  | 2.05       | <0.0050  | -0.380   | -0.161   | -0.147 | 0.672   | -456                  | 4.06  | -2.44   | -0.09  | 1.62    | 447  |
|                  | ALL S:B | 0.39       | 0.3826   | -0.111   | 0.124    | 0.254  | 0.577   | 227                   | 3.35  | -1.67   | 0.22   | 1.68    | 263  |
| Virus Trimmed    | ALL A:B | 1.58       | <0.0050  | 0.219    | -0.338   | -0.008 | 0.827   | -10183                | 4.16  | -1.78   | 0.11   | 2.38    | 144  |
|                  | ALL A:S | 1.03       | 0.0101   | -0.128   | 0.068    | -0.410 | 0.701   | -171                  | 3.95  | -2.44   | -0.35  | 1.51    | 146  |
|                  | ALL AF  | 0.47       | 0.250    | 0.196    | 0.045    | -0.210 | 0.791   | -376                  | 4.82  | -2.44   | -0.21  | 2.38    | 290  |
|                  | ALL S:B | 0.30       | 0.5706   | -0.204   | 0.034    | 0.276  | 0.629   | 228                   | 3.38  | -1.7    | 0.29   | 1.68    | 177  |
| Bacteria A:B     | day 8   | 12.53      | <0.0050  | 1.353    | 4.175    | -0.099 | 0.395   | -400                  | 3.34  | -1.03   | -0.16  | 2.31    | 710  |
|                  | day 19  | 0.78       | 0.0434   | 0.122    | 1.290    | 0.092  | 0.436   | 471                   | 3.91  | -1.59   | 0.09   | 2.33    | 710  |
|                  | day 24  | 0.87       | 0.0253   | 0.355    | 1.213    | -0.160 | 0.288   | -180                  | 2.19  | -1.10   | -0.17  | 1.09    | 710  |
|                  | day 28  | 5.46       | <0.0050  | 0.508    | 3.723    | -0.023 | 0.253   | -1106                 | 2.39  | -1.02   | -0.03  | 1.37    | 710  |
|                  | day 34  | 8.40       | <0.0050  | 0.619    | 0.765    | 0.095  | 0.393   | 413                   | 2.62  | -1.11   | 0.03   | 1.52    | 710  |
| Bacteria A:S     | day 8   | 6.08       | <0.0050  | 0.902    | 2.142    | -0.121 | 0.423   | -348                  | 2.96  | -1.18   | -0.17  | 1.78    | 710  |
|                  | day 19  | 1.35       | <0.0050  | 0.243    | 1.751    | 0.033  | 0.423   | 1264                  | 4.02  | -1.63   | 0.01   | 2.39    | 710  |
|                  | day 24  | 0.68       | 0.0771   | 0.007    | 0.076    | -0.137 | 0.282   | -206                  | 1.77  | -0.97   | -0.13  | 0.80    | 710  |
|                  | day 28  | 1.47       | <0.0050  | 0.331    | 1.595    | -0.060 | 0.247   | -412                  | 1.97  | -0.96   | -0.06  | 1.01    | 710  |
|                  | day 34  | 6.62       | <0.0050  | 0.340    | 1.600    | -0.064 | 0.350   | -550                  | 2.78  | -1.60   | -0.09  | 1.19    | 710  |
| Bacteria S:B     | day 0   | 7.93       | <0.0050  | -0.861   | 0.995    | 0.090  | 0.343   | 381                   | 2.14  | -1.20   | 0.14   | 0.93    | 710  |
|                  | day 8   | 13.70      | <0.0050  | 1.258    | 6.142    | 0.022  | 0.185   | 822                   | 1.76  | -0.66   | 0.01   | 1.11    | 710  |
|                  | day 19  | 5.46       | <0.0050  | 1.154    | 5.543    | 0.059  | 0.122   | 206                   | 1.34  | -0.34   | 0.05   | 1.00    | 710  |
|                  | day 24  | 8.48       | <0.0050  | 0.317    | 2.347    | -0.023 | 0.179   | -774                  | 1.53  | -0.68   | -0.02  | 0.85    | 710  |
|                  | day 28  | *          | <0.0050  | 1.933    | 16.100   | 0.037  | 0.160   | 429                   | 2.10  | -0.50   | 0.03   | 1.61    | 710  |
|                  | day 34  | 3.81       | <0.0050  | 0.286    | 2.932    | 0.159  | 0.332   | 209                   | 3.11  | -1.00   | 0.17   | 2.11    | 710  |
| Virus A:B        | day 8   | 1.85       | <0.0050  | 0.049    | -1.483   | -0.230 | 0.823   | -358                  | 2.96  | -1.78   | -0.29  | 1.18    | 43   |
|                  | day 19  | 1.64       | <0.0050  | 1.726    | 4.575    | -0.227 | 0.507   | -224                  | 2.59  | -0.97   | -0.25  | 1.62    | 44   |
|                  | day 24  | 1.91       | <0.0050  | -0.244   | -1.519   | -0.322 | 0.648   | -201                  | 2.12  | -1.54   | -0.08  | 0.58    | 45   |
|                  | day 28  | 2.10       | <0.0050  | -2.931   | 14.059   | 0.303  | 0.351   | 116                   | 2.24  | -1.45   | 0.31   | 0.79    | 44   |
|                  | day 34  | 2.40       | <0.0050  | 0.211    | 4.307    | 0.881  | 0.548   | 62                    | 3.32  | -0.94   | 0.86   | 2.38    | 41   |
| Virus A:S        | day 8   | 2.88       | <0.0050  | -0.020   | -1.703   | -0.417 | 1.168   | -280                  | 3.95  | -2.44   | -0.17  | 1.51    | 44   |
|                  | day 19  | 0.67       | 0.077    | 0.526    | -0.100   | -0.224 | 0.474   | -212                  | 2.01  | -1.20   | -0.27  | 0.81    | 45   |
|                  | day 24  | 0.97       | 0.0135   | 0.398    | 0.170    | -0.483 | 0.538   | -111                  | 2.27  | -1.35   | -0.36  | 0.92    | 46   |
|                  | day 28  | 0.29       | 0.6091   | -0.100   | -0.599   | -0.214 | 0.376   | -176                  | 1.61  | -1.04   | -0.21  | 0.57    | 44   |
|                  | day 34  | 0.91       | 0.019    | 0.695    | 1.589    | -0.080 | 0.367   | -457                  | 1.82  | -0.87   | -0.10  | 0.95    | 44   |
| Virus S:B        | day 0   | 0.31       | 0.5526   | -0.431   | -0.023   | -0.221 | 0.542   | -245                  | 2.43  | -1.67   | -0.22  | 0.76    | 46   |
|                  | day 8   | 0.79       | 0.0362   | -0.654   | 0.244    | 0.183  | 0.490   | 268                   | 2.30  | -1.26   | 0.29   | 1.04    | 42   |
|                  | day 19  | 0.29       | 0.5923   | 0.333    | 0.720    | 0.000  | 0.327   | -3.4x10 <sup>18</sup> | 1.58  | -0.71   | 0.01   | 0.87    | 45   |
|                  | day 24  | 0.41       | 0.3244   | -0.372   | -0.447   | 0.172  | 0.352   | 204                   | 1.49  | -0.68   | 0.22   | 0.81    | 45   |
|                  | day 28  | 0.60       | 0.1128   | -0.289   | 1.711    | 0.532  | 0.497   | 93                    | 2.77  | -1.12   | 0.50   | 1.65    | 46   |
|                  | day 34  | 1.68       | <0.0050  | -1.295   | 1.716    | 0.951  | 0.414   | 44                    | 1.96  | -0.28   | 1.03   | 1.68    | 39   |

Normality is tested by the Anderson–Darling (AD) normality test, skewness, kurtosis (excess), and inspection of histograms. For the AD test, p-values below 0.05 demonstrate data is significantly non-normal. Departure from zero indicates increasing non-normality in skewness and kurtosis values.

**Supplementary Table 8 Percent of population in bacterial and viral reads in >3 μm, 3–0.2 μm, and 0.2–0.025 μm size fractions in bulk, SSML, and aerosol samples from read-based k-mer sequence analysis**

|          | Bulk<br>> 3 μm | SSML<br>> 3 μm | Aerosol<br>> 3 μm | Bulk<br>3 - 0.2 μm | SSML<br>3 - 0.2 μm | Aerosol<br>3 - 0.2 μm | Bulk<br>0.2 - 0.025 μm | SSML<br>0.2 - 0.025 μm | Aerosol<br>0.2 - 0.025 μm |
|----------|----------------|----------------|-------------------|--------------------|--------------------|-----------------------|------------------------|------------------------|---------------------------|
| Bacteria | 91.45          | 91.13          | 92.50             | 95.13              | 95.91              | 96.49                 | 91.49                  | 83.01                  | 92.25                     |
| Viruses  | 7.28           | 7.72           | 6.86              | 4.27               | 3.63               | 3.03                  | 8.00                   | 16.15                  | 7.18                      |

### 3. Supplementary Notes

#### **Supplementary Note 1: Bloom dynamics**

Chlorophyll *a* peaked at 21.7  $\mu\text{g L}^{-1}$  for bloom 1 and 30.0  $\mu\text{g L}^{-1}$  for bloom 2 (Fig. 1, Supplementary Fig. 1). Major phytoplankton blooms at Scripps Pier generally have chlorophyll *a* levels in the range of 18 – 219  $\mu\text{g L}^{-1}$ , placing this on the low end of natural major bloom from the same source water. Bacteria counts were found to be in the range of  $0.65 \times 10^6 \pm 0.01 \times 10^6$  to  $3.98 \times 10^6 \pm 0.02 \times 10^6$  cells  $\text{mL}^{-1}$  in bulk water,  $0.36 \times 10^6 \pm 0.01 \times 10^6$  to  $3.34 \times 10^6 \pm 0.03 \times 10^6$  cells  $\text{mL}^{-1}$  in SSML, and  $0.09 \times 10^7 \pm 0.06 \times 10^7$  to  $5.83 \times 10^7 \pm 0.58 \times 10^7$  cells  $\text{m}^{-3}$  in aerosol. Oceanic values for bacteria range from  $10^4$  to  $10^6$  cells  $\text{mL}^{-1}$ , making the values here on the high end of ocean concentrations. However, considering bacterial abundance increases linearly with chlorophyll<sup>3</sup> and under certain conditions oceanic concentrations have been found to up to  $10^8$  cells  $\text{mL}^{-1}$ ,<sup>4</sup> these values seem especially relevant. Aerosol bacteria concentrations are estimated to be  $\sim 10^2$  to  $10^4$  cells  $\text{m}^{-3}$ .<sup>5</sup> Virus abundances were found to be  $1 \times 10^7$  to  $8 \times 10^7$  cells  $\text{mL}^{-1}$  in bulk and SSML and  $0.3 \times 10^7$  to  $7.7 \times 10^7$  cells  $\text{m}^{-3}$  in aerosol which is  $\sim 10$ -fold higher than water bacteria concentrations and approximately the same as bacterial concentrations in aerosol.

#### **Supplementary Note 2: Genomic data analysis**

**DNA yields.** DNA recovery and estimated original concentrations in native samples are given in Supplementary Table 1. DNA abundance was determined by Qubit™ (ThermoFisher).

**Metagenomic sequencing.** A total of 625 million reads were trimmed and quality filtered generating on average 3.0 million sequence reads with lengths of 2 x 142 bp and GC content of 48% (Supplementary Table 2). Taxonomic profiling generated a total of 700 bacterial, 10 archaeal and 28 viral species in samples from the 0.02–3  $\mu\text{m}$  size fraction after data filtering. The  $>3 \mu\text{m}$  and 0.025–0.2  $\mu\text{m}$  fraction were also trimmed similarly to generate 613 species (576 bacteria, 8 archaea, 29 viruses) and 627 species (585 bacteria, 7 archaea, 35 viruses), respectively. The viral species from the three fractions were pooled to yield 46 viral species.

**Coverage analysis.** 198 bacteria and 46 viral species identified using Kraken were further examined for genomic coverage. Scaffolds from species' assignments were examined against published genomes (Supplementary Table 3). This represented 28% of the species above abundance thresholds. Species below 0.1% spatial coverage were removed resulting in a coverage trimmed set of 76 bacterial and 30 viral species.

**Genomic assembly and annotation.** Sixty-two metagenomes resulted from assembly of shotgun reads. k-mer based binning (Vizbin) isolated seven bins (Np-bin1, 2, 3, 4, 5, 6, 8) and a mosaic bin (bin7). The remaining bin7 was a mosaic of genomes and thus was examined using sample-specific sequencing coverage vectors and hierarchical clustering, generating a further 14 bins. Completeness of bins was assessed using CheckM (Supplementary Table 4).

Genome bins, while mostly not complete, were recovered for Bacteria, Eukarya, and multiple viral lineages. The completeness appears to be mostly due to more conserved regions of the genome fragmenting during the secondary co-assembly, which did decrease large contigs. The low completeness (CheckM) for several genomes rather large in size is consistent with this. Annotation of genomes was performed by APIS and manual curation<sup>6</sup>. Summaries of genome bins are given in Supplementary Table 5. Additionally, the resulting draft genomes were run through read-based pipeline utilizing Kraken to detect similarity between the annotations of the different approaches. There was good agreement between annotations when genome coverage was adequate.

#### 4. Supplementary References

1. Kim, H., Miller, A. J., McGowan, J. & Carter, M. L. Coastal phytoplankton blooms in the Southern California Bight. *Prog. Oceanogr.* **82**, 137–147 (2009).
2. Whitman, W. B., Coleman, D. C. & Wiebe, W. J. Prokaryotes: the unseen majority. *Proc. Natl. Acad. Sci. U. S. A.* **95**, 6578–6583 (1998).
3. Bird, D. F. & Kalff, J. Empirical Relationships between Bacterial Abundance and Chlorophyll Concentration in Fresh and Marine Waters. *Can. J. Fish. Aquat. Sci.* **41**, 1015–1023 (1984).
4. Turley, C. M. & Mackie, P. J. Biogeochemical significance of attached and free-living bacteria and the flux of particles in the NE Atlantic Ocean. *Mar. Ecol. Prog. Ser.* **115**, 191–204 (1994).
5. Burrows, S. M., Elbert, W., Lawrence, M. G. & Pöschl, U. Bacteria in the global atmosphere – Part 1: Review and synthesis of literature data for different ecosystems. *Atmos. Chem. Phys.* **9**, 9263–9280 (2009).
6. Dupont, C. L. *et al.* Functional tradeoffs underpin salinity-driven divergence in microbial community composition. *PLoS One* **9**, (2014).
